# Supplementary material
Source: publisher site journal article supplement (https://www.dovepress.com/get_supplementary_file.php?f=505863.docx)
Supplement: Supplementary file 1 [file get_supplementary_file.php]

**Serum lipidomic analysis of T2DM patients: a potential biomarker study**

Wenwen Qi1, Chunjing Yang2,3, Jingfeng Li2,3, Li Bao2,3,*

1 Department of Geriatrics, Beijing Shijitan Hospital, Capital Medical University, No.10 Tieyi-Road, Haidian District, Beijing, China;

2 Department of Pharmacy, Beijing Shijitan Hospital, Capital Medical University, No.10 Tieyi-Road, Haidian District, Beijing, China;

3 Beijing Key Laboratory of Bio-characteristic Profiling for Evaluation of Rational Drug Use, No.10 Tieyi-Road, Haidian District, Beijing, China;

Correspondence:

**Dr, Li Bao**

Department of Pharmacy, Beijing Shijitan Hospital, Capital Medical University, No.10 Tieyi-Road, Haidian District, 10038, Beijing, China

Tel: +86-10-63926405

Email: baoli3712@bjsjth.cn


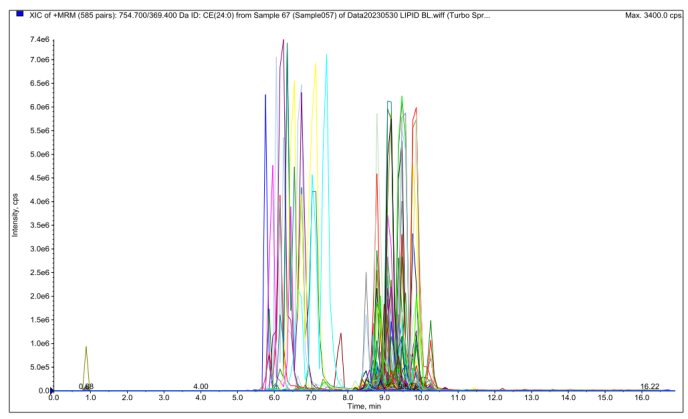

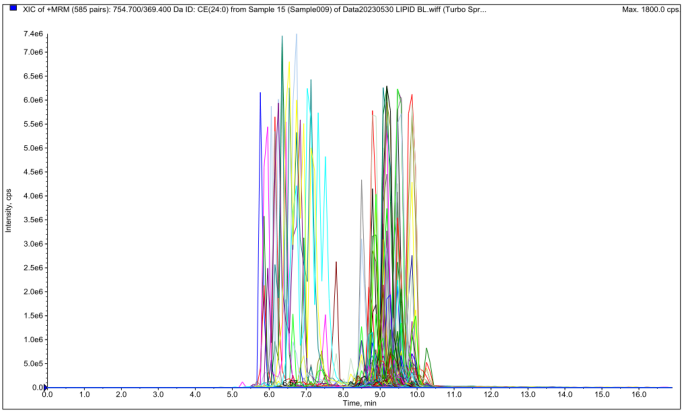

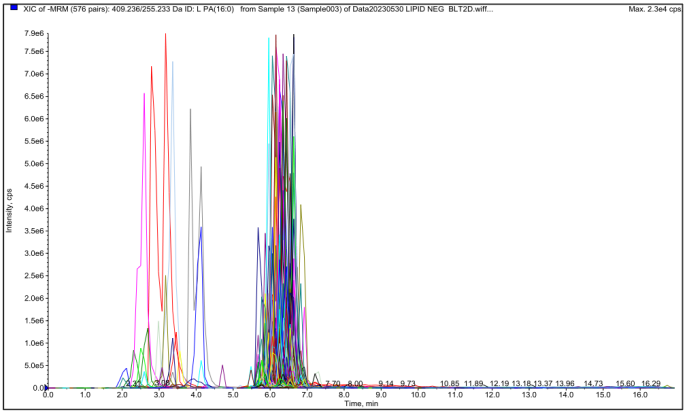

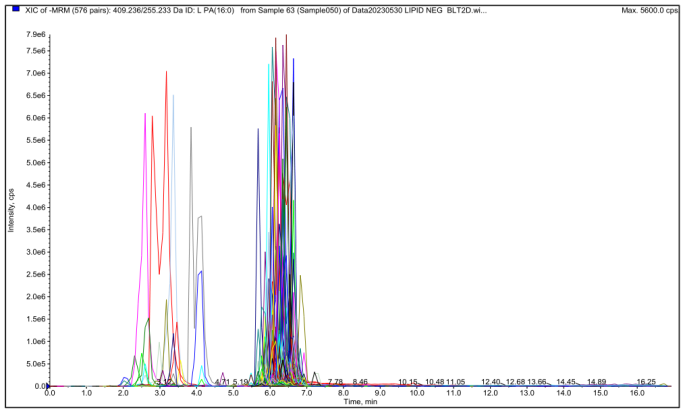


**A**

**D**

**B**

**C**

Figure S1 Representive MRM chromatogram. (healthy group (A) and T2DM group (B) in positive mode, healthy group (C) and T2DM group (D) in negtive mode)


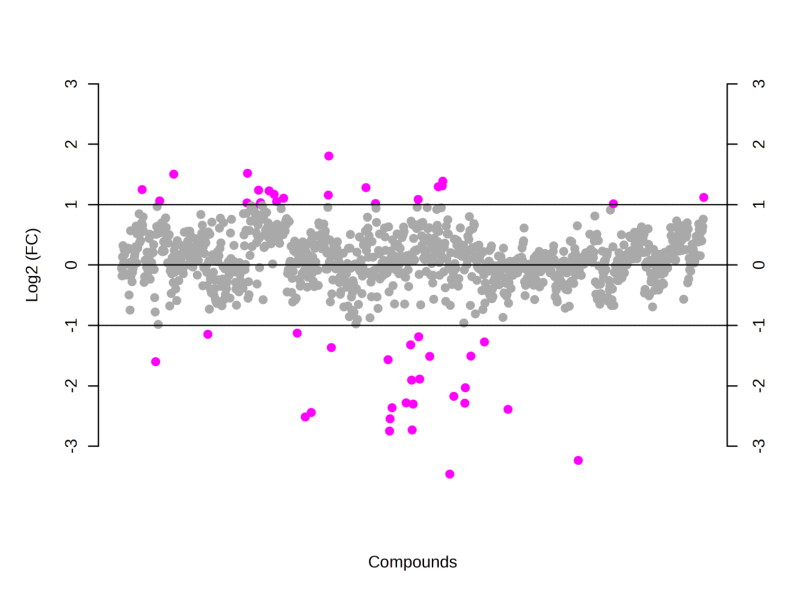


Figure S2 Fold change (FC) of the significantly changed lipids in T2DM


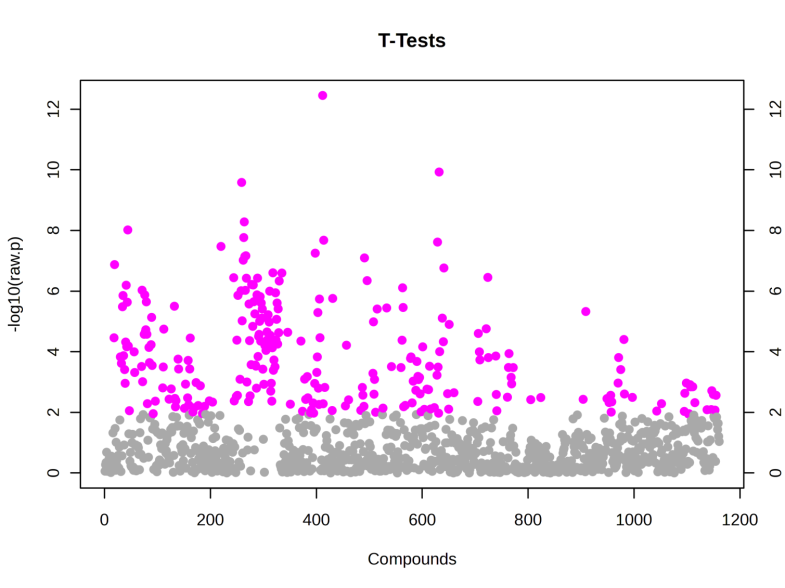


Figure S3 T-tests analysis of lipid metabolites in plasma sample


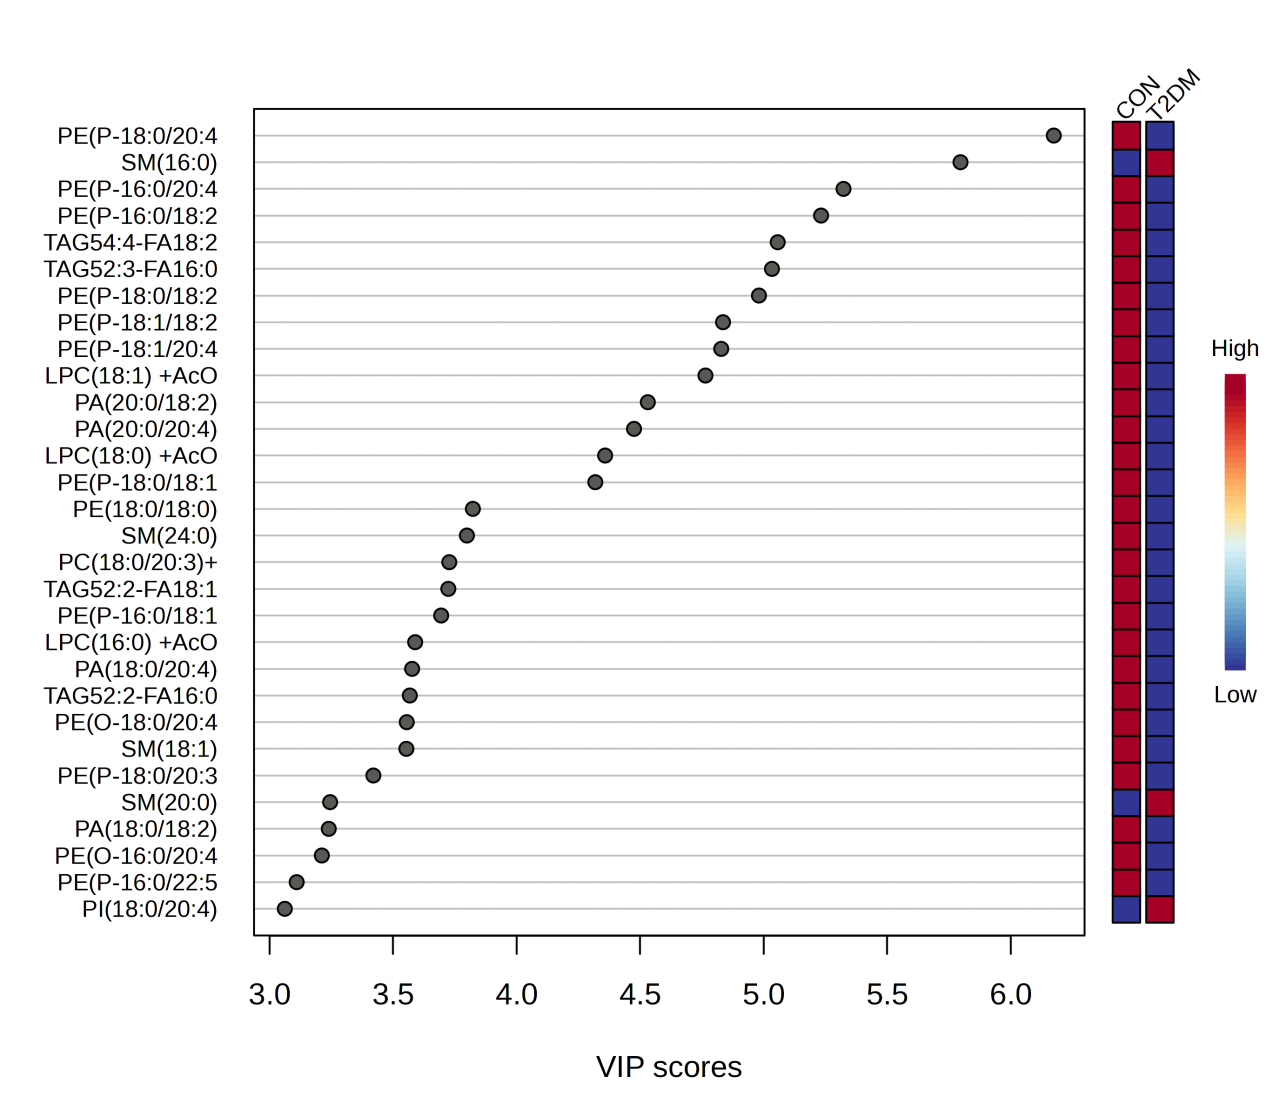


Figure S4 VIP scores represent the most contributing metabolites involved in the separation between Healthy volunteers and T2DM patients (the top of 30).


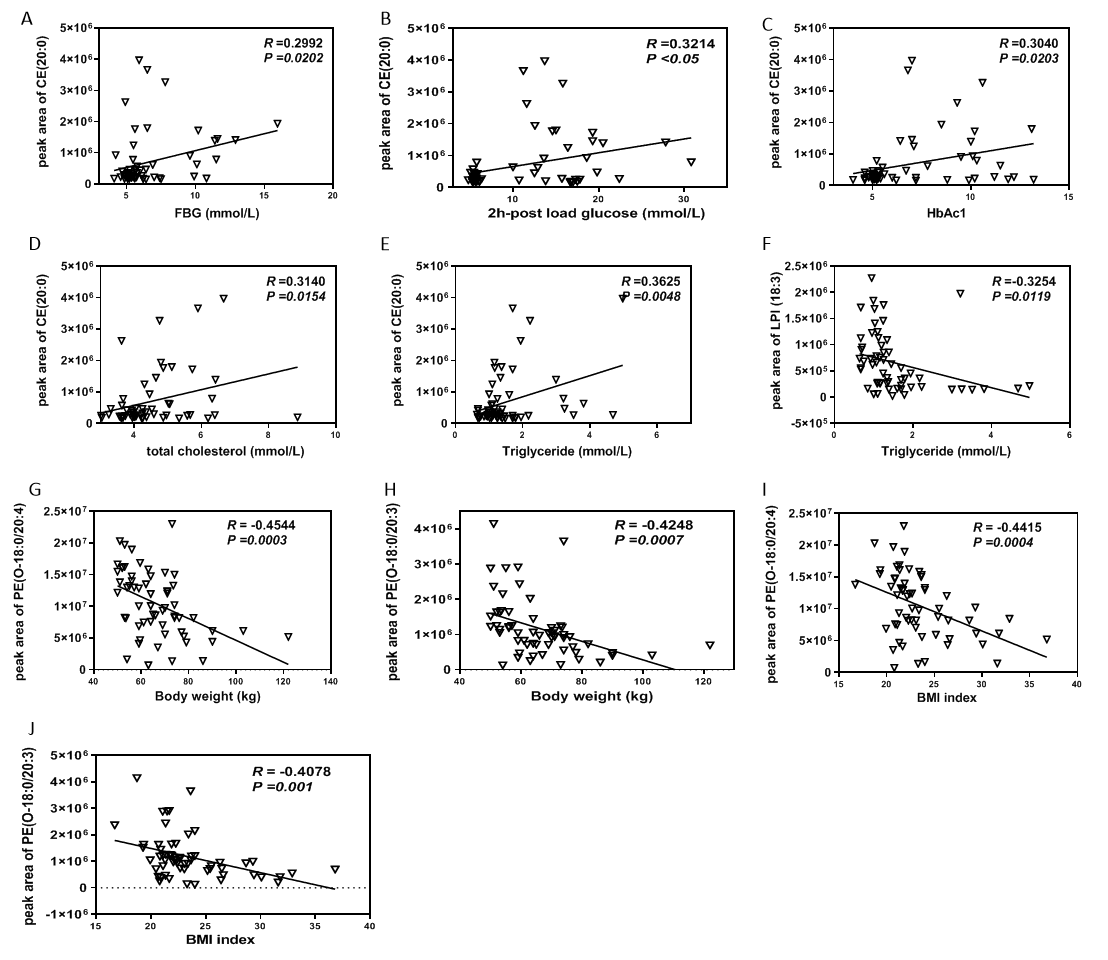
Figure S5 Linear regression of the significantly changed lipids with the physiological parameters. Linear regression of CE (20:0) with FBG (A), 2h-post load BG (B), HbAc1 (C), TC (D) and TG (E); linear regression of LPI (18:3) with TG (F),

linear regression of PE(O-18:0/20:4) (G) and PE (O-18:0/20:3) (H) with body weight, and linear regression of PE(O-18:0/20:4) (I) and PE (O-18:0/20:3) (J) with BMI index.

Table S1 MS parameters of lipid metabolites in Positive mode

|  | Name | Q1 | Q3 | DP | CE |  | Name | Q1 | Q3 | DP | CE |
| --- | --- | --- | --- | --- | --- | --- | --- | --- | --- | --- | --- |
| **1** | CE(24:0) | 754.7 | 369.4 | 150 | 25 | **294** | TAG51:2-FA16:0 | 862.8 | 589.5 | 150 | 38 |
| **2** | CE(22:6) | 714.6 | 369.4 | 150 | 25 | **295** | TAG51:2-FA16:1 | 862.8 | 591.5 | 150 | 38 |
| **3** | CE(20:0) | 698.7 | 369.4 | 150 | 25 | **296** | TAG51:2-FA17:0 | 862.8 | 575.5 | 150 | 38 |
| **4** | CE(20:1) | 696.7 | 369.4 | 150 | 25 | **297** | TAG51:2-FA18:1 | 862.8 | 563.5 | 150 | 38 |
| **5** | CE(22:5) | 716.6 | 369.4 | 150 | 25 | **298** | TAG51:2-FA18:2 | 862.8 | 565.5 | 150 | 38 |
| **6** | CE(14:0) | 614.6 | 369.4 | 150 | 25 | **299** | TAG51:3-FA16:1 | 860.8 | 589.5 | 150 | 38 |
| **7** | CE(16:0) | 642.6 | 369.4 | 150 | 25 | **300** | TAG51:3-FA17:0 | 860.8 | 573.5 | 150 | 38 |
| **8** | CE(16:1) | 640.6 | 369.4 | 150 | 25 | **301** | TAG51:3-FA18:2 | 860.8 | 563.5 | 150 | 38 |
| **9** | CE(18:0) | 670.6 | 369.4 | 150 | 25 | **302** | TAG51:3-FA18:3 | 860.8 | 565.5 | 150 | 38 |
| **10** | CE(18:1) | 668.6 | 369.4 | 150 | 25 | **303** | TAG51:4-FA16:1 | 858.8 | 587.5 | 150 | 38 |
| **11** | CE(18:2) | 666.6 | 369.4 | 150 | 25 | **304** | TAG51:4-FA18:2 | 858.8 | 561.5 | 150 | 38 |
| **12** | CE(18:3) | 664.6 | 369.4 | 150 | 25 | **305** | TAG51:4-FA18:3 | 858.8 | 563.5 | 150 | 38 |
| **13** | CE(20:2) | 694.6 | 369.4 | 150 | 25 | **306** | TAG51:4-FA20:4 | 858.8 | 537.5 | 150 | 38 |
| **14** | CE(20:3) | 692.6 | 369.4 | 150 | 25 | **307** | TAG51:5-FA18:2 | 856.8 | 559.5 | 150 | 38 |
| **15** | CE(20:4) | 690.6 | 369.4 | 150 | 25 | **308** | TAG51:5-FA18:3 | 856.8 | 561.5 | 150 | 38 |
| **16** | CE(20:5) | 688.6 | 369.4 | 150 | 25 | **309** | TAG52:0-FA16:0 | 880.8 | 607.5 | 150 | 38 |
| **17** | CE(22:0) | 726.7 | 369.4 | 150 | 25 | **310** | TAG52:0-FA18:0 | 880.8 | 579.5 | 150 | 38 |
| **18** | CE(22:1) | 724.7 | 369.4 | 150 | 25 | **311** | TAG52:0-FA20:0 | 880.8 | 551.503 | 150 | 38 |
| **19** | CE(22:2) | 722.7 | 369.4 | 150 | 25 | **312** | TAG52:1-FA16:0 | 878.8 | 605.5 | 150 | 38 |
| **20** | CE(22:4) | 718.6 | 369.4 | 150 | 25 | **313** | TAG52:1-FA16:1 | 878.8 | 607.5 | 150 | 38 |
| **21** | CE(24:1) | 752.7 | 369.4 | 150 | 43 | **314** | TAG52:1-FA18:0 | 878.8 | 577.5 | 150 | 38 |
| **22** | CER(14:0) | 510.6 | 264.4 | 150 | 43 | **315** | TAG52:1-FA18:1 | 878.8 | 579.5 | 150 | 38 |
| **23** | CER(16:0) | 538.6 | 264.4 | 150 | 43 | **316** | TAG52:1-FA20:0 | 878.8 | 549.5 | 150 | 38 |
| **24** | CER(18:0) | 566.7 | 264.4 | 150 | 43 | **317** | TAG52:1-FA20:1 | 878.8 | 551.503 | 150 | 38 |
| **25** | CER(18:1) | 564.8 | 264.4 | 150 | 43 | **318** | TAG52:2-FA14:0 | 876.8 | 631.6 | 150 | 38 |
| **26** | CER(20:0) | 594.6 | 264.4 | 150 | 43 | **319** | TAG52:2-FA16:0 | 876.8 | 603.5 | 150 | 38 |
| **27** | CER(20:1) | 592.6 | 264.4 | 150 | 43 | **320** | TAG52:2-FA16:1 | 876.8 | 605.5 | 150 | 38 |
| **28** | CER(22:0) | 622.7 | 264.4 | 150 | 43 | **321** | TAG52:2-FA18:0 | 876.8 | 575.5 | 150 | 38 |
| **29** | CER(22:1) | 620.7 | 264.4 | 150 | 43 | **322** | TAG52:2-FA18:1 | 876.8 | 577.5 | 150 | 38 |
| **30** | CER(24:0) | 650.8 | 264.4 | 150 | 43 | **323** | TAG52:2-FA18:2 | 876.8 | 579.5 | 150 | 38 |
| **31** | CER(24:1) | 648.8 | 264.4 | 150 | 43 | **324** | TAG52:2-FA20:0 | 876.8 | 547.5 | 150 | 38 |
| **32** | CER(26:0) | 678.9 | 264.4 | 150 | 43 | **325** | TAG52:2-FA20:1 | 876.8 | 549.5 | 150 | 38 |
| **33** | CER(26:1) | 676.9 | 264.4 | 150 | 43 | **326** | TAG52:2-FA20:2 | 876.8 | 551.503 | 150 | 38 |
| **34** | DCER(14:0) | 512.6 | 266.4 | 150 | 43 | **327** | TAG52:3-FA14:0 | 874.8 | 629.6 | 150 | 38 |
| **35** | DCER(16:0) | 540.6 | 266.4 | 150 | 43 | **328** | TAG52:3-FA16:0 | 874.8 | 601.5 | 150 | 38 |
| **36** | DCER(18:0) | 568.7 | 266.4 | 150 | 43 | **329** | TAG52:3-FA16:1 | 874.8 | 603.5 | 150 | 38 |
| **37** | DCER(18:1) | 566.8 | 266.4 | 150 | 43 | **330** | TAG52:3-FA18:0 | 874.8 | 573.5 | 150 | 38 |
| **38** | DCER(20:0) | 596.7 | 266.4 | 150 | 43 | **331** | TAG52:3-FA18:1 | 874.8 | 575.5 | 150 | 38 |
| **39** | DCER(20:1) | 594.4 | 266.4 | 150 | 43 | **332** | TAG52:3-FA18:2 | 874.8 | 577.5 | 150 | 38 |
| **40** | DCER(22:0) | 624.8 | 266.4 | 150 | 43 | **333** | TAG52:3-FA18:3 | 874.8 | 579.5 | 150 | 38 |
| **41** | DCER(22:1) | 620.4 | 266.4 | 150 | 43 | **334** | TAG52:3-FA20:0 | 874.8 | 545.5 | 150 | 38 |
| **42** | DCER(24:0) | 652.9 | 266.4 | 150 | 43 | **335** | TAG52:3-FA20:1 | 874.8 | 547.5 | 150 | 38 |
| **43** | DCER(24:1) | 650.9 | 266.4 | 150 | 43 | **336** | TAG52:3-FA20:2 | 874.8 | 549.5 | 150 | 38 |
| **44** | DCER(26:0) | 680.5 | 266.4 | 150 | 43 | **337** | TAG52:3-FA20:3 | 874.8 | 551.503 | 150 | 38 |
| **45** | DCER(26:1) | 678.5 | 266.4 | 150 | 43 | **338** | TAG52:4-FA14:0 | 872.8 | 627.6 | 150 | 38 |
| **46** | HCER(14:0) | 672.5 | 264.4 | 150 | 43 | **339** | TAG52:4-FA16:0 | 872.8 | 599.5 | 150 | 38 |
| **47** | HCER(16:0) | 700.7 | 264.4 | 150 | 43 | **340** | TAG52:4-FA16:1 | 872.8 | 601.5 | 150 | 38 |
| **48** | HCER(18:0) | 728.8 | 264.4 | 150 | 43 | **341** | TAG52:4-FA18:0 | 872.8 | 571.5 | 150 | 38 |
| **49** | HCER(18:1) | 726.7 | 264.4 | 150 | 43 | **342** | TAG52:4-FA18:1 | 872.8 | 573.5 | 150 | 38 |
| **50** | HCER(20:0) | 756.7 | 264.4 | 150 | 43 | **343** | TAG52:4-FA18:2 | 872.8 | 575.5 | 150 | 38 |
| **51** | HCER(20:1) | 754.7 | 264.4 | 150 | 43 | **344** | TAG52:4-FA18:3 | 872.8 | 577.5 | 150 | 38 |
| **52** | HCER(22:0) | 784.9 | 264.4 | 150 | 43 | **345** | TAG52:4-FA20:0 | 872.8 | 543.5 | 150 | 38 |
| **53** | HCER(22:1) | 782.8 | 264.4 | 150 | 43 | **346** | TAG52:4-FA20:2 | 872.8 | 547.5 | 150 | 38 |
| **54** | HCER(24:0) | 812.9 | 264.4 | 150 | 43 | **347** | TAG52:4-FA20:3 | 872.8 | 549.5 | 150 | 38 |
| **55** | HCER(24:1) | 810.9 | 264.4 | 150 | 43 | **348** | TAG52:4-FA20:4 | 872.8 | 551.503 | 150 | 38 |
| **56** | HCER(26:0) | 840.9 | 264.4 | 150 | 43 | **349** | TAG52:4-FA22:4 | 872.8 | 523.472 | 150 | 38 |
| **57** | HCER(26:1) | 838.9 | 264.4 | 150 | 43 | **350** | TAG52:5-FA14:0 | 870.8 | 625.6 | 150 | 38 |
| **58** | HexCer d18:1/12:0 | 644.5 | 264.4 | 150 | 43 | **351** | TAG52:5-FA16:0 | 870.8 | 597.5 | 150 | 38 |
| **59** | LacCer d18:1/12:0 | 806.6 | 264.4 | 150 | 43 | **352** | TAG52:5-FA16:1 | 870.8 | 599.5 | 150 | 38 |
| **60** | LCER(14:0) | 834.9 | 264.4 | 150 | 43 | **353** | TAG52:5-FA18:1 | 870.8 | 571.5 | 150 | 38 |
| **61** | LCER(16:0) | 862.9 | 264.4 | 150 | 43 | **354** | TAG52:5-FA18:2 | 870.8 | 573.5 | 150 | 38 |
| **62** | LCER(18:0) | 890.2 | 264.4 | 150 | 43 | **355** | TAG52:5-FA18:3 | 870.8 | 575.5 | 150 | 38 |
| **63** | LCER(18:1) | 888.2 | 264.4 | 150 | 43 | **356** | TAG52:5-FA20:3 | 870.8 | 547.5 | 150 | 38 |
| **64** | LCER(20:0) | 918.2 | 264.4 | 150 | 43 | **357** | TAG52:5-FA20:4 | 870.8 | 549.5 | 150 | 38 |
| **65** | LCER(20:1) | 916.2 | 264.4 | 150 | 43 | **358** | TAG52:5-FA20:5 | 870.8 | 551.503 | 150 | 38 |
| **66** | LCER(22:0) | 946.2 | 264.4 | 150 | 43 | **359** | TAG52:5-FA22:5 | 870.8 | 523.472 | 150 | 38 |
| **67** | LCER(22:1) | 944.2 | 264.4 | 150 | 43 | **360** | TAG52:6-FA14:0 | 868.8 | 623.6 | 150 | 38 |
| **68** | LCER(24:0) | 974.8 | 264.4 | 150 | 43 | **361** | TAG52:6-FA16:0 | 868.8 | 595.5 | 150 | 38 |
| **69** | LCER(24:1) | 972.9 | 264.4 | 150 | 43 | **362** | TAG52:6-FA16:1 | 868.8 | 597.5 | 150 | 38 |
| **70** | LCER(26:0) | 1002.4 | 264.4 | 150 | 43 | **363** | TAG52:6-FA18:1 | 868.8 | 569.5 | 150 | 38 |
| **71** | LCER(26:1) | 1000.4 | 264.4 | 150 | 38 | **364** | TAG52:6-FA18:2 | 868.8 | 571.5 | 150 | 38 |
| **72** | GluCer d18:0/18:0 | 730.7 | 266.4 | 150 | 43 | **365** | TAG52:6-FA18:3 | 868.8 | 573.5 | 150 | 38 |
| **73** | GluCer d18:0/20:0 | 758.7 | 266.4 | 150 | 43 | **366** | TAG52:6-FA20:4 | 868.8 | 547.5 | 150 | 38 |
| **74** | GluCer d18:0/22:0 | 786.8 | 266.4 | 150 | 43 | **367** | TAG52:6-FA20:5 | 868.8 | 549.5 | 150 | 38 |
| **75** | GluCer d18:0/24:0 | 814.9 | 266.4 | 150 | 43 | **368** | TAG52:6-FA22:6 | 868.8 | 523.472 | 150 | 38 |
| **76** | GluCer d18:0/24:1 | 812.9 | 266.4 | 150 | 43 | **369** | TAG52:7-FA16:0 | 866.7 | 593.4 | 150 | 38 |
| **77** | GluCer d18:0/26:0 | 842.9 | 266.4 | 150 | 43 | **370** | TAG52:7-FA18:1 | 866.7 | 567.4 | 150 | 38 |
| **78** | GluCer d18:0/26:1 | 840.9 | 266.4 | 150 | 43 | **371** | TAG52:7-FA20:5 | 866.7 | 547.4 | 150 | 38 |
| **79** | DAG(14:0/14:0) | 530.4 | 285.2 | 150 | 26 | **372** | TAG52:7-FA22:6 | 866.7 | 521.4 | 150 | 38 |
| **80** | DAG(14:0/16:1) | 556.5 | 285.2 | 150 | 26 | **373** | TAG52:8-FA16:1 | 864.8 | 593.5 | 150 | 38 |
| **81** | DAG(16:0/16:0) | 586.5 | 313.3 | 150 | 26 | **374** | TAG52:8-FA18:2 | 864.8 | 567.5 | 150 | 38 |
| **82** | DAG(16:0/16:1) | 584.4 | 313.2 | 150 | 26 | **375** | TAG53:0-FA16:0 | 894.8 | 621.5 | 150 | 38 |
| **83** | DAG(14:0/18:1) | 584.4 | 285.2 | 150 | 26 | **376** | TAG53:1-FA16:0 | 892.8 | 619.5 | 150 | 38 |
| **84** | DAG(16:1/16:1) | 582.4 | 311.2 | 150 | 26 | **377** | TAG53:1-FA17:0 | 892.8 | 605.5 | 150 | 38 |
| **85** | DAG(14:0/18:2) | 582.4 | 285.2 | 150 | 26 | **378** | TAG53:1-FA18:0 | 892.8 | 591.5 | 150 | 38 |
| **86** | DAG(14:0/18:3) | 580.4 | 285.2 | 150 | 26 | **379** | TAG53:1-FA18:1 | 892.8 | 593.5 | 150 | 38 |
| **87** | DAG(14:0/20:0) | 614.6 | 285.2 | 150 | 26 | **380** | TAG53:2-FA16:0 | 890.8 | 617.5 | 150 | 38 |
| **88** | DAG(16:0/18:0) | 614.4 | 313.2 | 150 | 26 | **381** | TAG53:2-FA17:0 | 890.8 | 603.5 | 150 | 38 |
| **89** | DAG(16:1/18:0) | 612.6 | 311.3 | 150 | 26 | **382** | TAG53:2-FA18:1 | 890.8 | 591.5 | 150 | 38 |
| **90** | DAG(16:0/18:1) | 612.6 | 313.2 | 150 | 26 | **383** | TAG53:2-FA18:2 | 890.8 | 593.5 | 150 | 38 |
| **91** | DAG(16:1/18:1) | 610.4 | 311.2 | 150 | 26 | **384** | TAG53:3-FA16:0 | 888.8 | 615.5 | 150 | 38 |
| **92** | DAG(16:0/18:2) | 610.4 | 313.2 | 150 | 26 | **385** | TAG53:3-FA17:0 | 888.8 | 601.5 | 150 | 38 |
| **93** | DAG(16:1/18:2) | 608.5 | 311.2 | 150 | 26 | **386** | TAG53:3-FA18:2 | 888.8 | 591.5 | 150 | 38 |
| **94** | DAG(16:0/18:3) | 608.5 | 313.2 | 150 | 26 | **387** | TAG53:4-FA16:0 | 886.8 | 613.5 | 150 | 38 |
| **95** | DAG(16:1/18:3) | 606.4 | 311.2 | 150 | 26 | **388** | TAG53:4-FA17:0 | 886.8 | 599.5 | 150 | 38 |
| **96** | DAG(14:0/20:4) | 606.4 | 285.2 | 150 | 26 | **389** | TAG53:4-FA18:2 | 886.8 | 589.5 | 150 | 38 |
| **97** | DAG(16:1/20:0) | 640.6 | 283.2 | 150 | 26 | **390** | TAG53:4-FA18:3 | 886.8 | 591.5 | 150 | 38 |
| **98** | DAG(18:0/18:1) | 640.4 | 341.3 | 150 | 26 | **391** | TAG53:4-FA20:4 | 886.8 | 565.5 | 150 | 38 |
| **99** | DAG(18:1/18:1) | 638.4 | 339.3 | 150 | 26 | **392** | TAG53:5-FA20:4 | 884.8 | 563.5 | 150 | 38 |
| **100** | DAG(18:0/18:2) | 638.4 | 341.3 | 150 | 26 | **393** | TAG53:6-FA20:4 | 882.8 | 561.5 | 150 | 38 |
| **101** | DAG(18:1/18:2) | 636.5 | 339.3 | 150 | 26 | **394** | TAG54:0-FA16:0 | 908.8 | 635.5 | 150 | 38 |
| **102** | DAG(18:0/18:3) | 636.5 | 341.3 | 150 | 26 | **395** | TAG54:0-FA18:0 | 908.8 | 607.5 | 150 | 38 |
| **103** | DAG(16:1/20:2) | 636.6 | 311.3 | 150 | 26 | **396** | TAG54:1-FA16:0 | 906.8 | 633.5 | 150 | 38 |
| **104** | DAG(16:0/20:3) | 636.5 | 313.3 | 150 | 26 | **397** | TAG54:1-FA18:0 | 906.8 | 605.5 | 150 | 38 |
| **105** | DAG(16:0/20:4) | 634.5 | 313.3 | 150 | 26 | **398** | TAG54:1-FA18:1 | 906.8 | 607.5 | 150 | 38 |
| **106** | DAG(18:2/18:3) | 632.4 | 337.3 | 150 | 26 | **399** | TAG54:1-FA20:0 | 906.8 | 577.5 | 150 | 38 |
| **107** | DAG(16:1/20:4) | 632.4 | 311.3 | 150 | 26 | **400** | TAG54:1-FA20:1 | 906.8 | 579.5 | 150 | 38 |
| **108** | DAG(16:0/20:5) | 632.4 | 313.3 | 150 | 26 | **401** | TAG54:2-FA16:0 | 904.8 | 631.5 | 150 | 38 |
| **109** | DAG(14:0/22:6) | 630.5 | 285.3 | 150 | 26 | **402** | TAG54:2-FA18:0 | 904.8 | 603.5 | 150 | 38 |
| **110** | DAG(18:1/20:1) | 666.6 | 339.3 | 150 | 26 | **403** | TAG54:2-FA18:1 | 904.8 | 605.5 | 150 | 38 |
| **111** | DAG(18:1/20:2) | 664.6 | 339.3 | 150 | 26 | **404** | TAG54:2-FA18:2 | 904.8 | 607.5 | 150 | 38 |
| **112** | DAG(18:1/20:3) | 662.6 | 339.3 | 150 | 26 | **405** | TAG54:2-FA20:0 | 904.8 | 575.5 | 150 | 38 |
| **113** | DAG(18:2/20:3) | 660.5 | 337.3 | 150 | 26 | **406** | TAG54:2-FA20:1 | 904.8 | 577.5 | 150 | 38 |
| **114** | DAG(18:1/20:4) | 660.5 | 339.3 | 150 | 26 | **407** | TAG54:2-FA20:2 | 904.8 | 579.5 | 150 | 38 |
| **115** | DAG(16:0/22:5) | 660.5 | 313.3 | 150 | 26 | **408** | TAG54:3-FA16:0 | 902.8 | 629.5 | 150 | 38 |
| **116** | DAG(18:2/20:4) | 658.5 | 337.3 | 150 | 26 | **409** | TAG54:3-FA16:1 | 902.8 | 631.5 | 150 | 38 |
| **117** | DAG(18:1/20:5) | 658.5 | 339.3 | 150 | 26 | **410** | TAG54:3-FA18:0 | 902.8 | 601.5 | 150 | 38 |
| **118** | DAG(16:0/22:6) | 658.5 | 313.3 | 150 | 26 | **411** | TAG54:3-FA18:1 | 902.8 | 603.5 | 150 | 38 |
| **119** | DAG(18:2/20:5) | 656.5 | 337.3 | 150 | 26 | **412** | TAG54:3-FA18:2 | 902.8 | 605.5 | 150 | 38 |
| **120** | DAG(16:1/22:6) | 656.5 | 311.3 | 150 | 26 | **413** | TAG54:3-FA18:3 | 902.8 | 607.5 | 150 | 38 |
| **121** | DAG(20:0/20:0) | 698.6 | 369.3 | 150 | 26 | **414** | TAG54:3-FA20:1 | 902.8 | 575.5 | 150 | 38 |
| **122** | DAG(18:1/22:4) | 688.6 | 339.3 | 150 | 26 | **415** | TAG54:3-FA20:2 | 902.8 | 577.5 | 150 | 38 |
| **123** | DAG(18:2/22:4) | 686.6 | 337.3 | 150 | 26 | **416** | TAG54:3-FA20:3 | 902.8 | 579.5 | 150 | 38 |
| **124** | DAG(18:1/22:5) | 686.6 | 339.3 | 150 | 26 | **417** | TAG54:4-FA16:0 | 900.8 | 627.5 | 150 | 38 |
| **125** | DAG(18:0/22:6) | 686.6 | 341.3 | 150 | 26 | **418** | TAG54:4-FA16:1 | 900.8 | 629.5 | 150 | 38 |
| **126** | DAG(18:2/22:5) | 684.6 | 337.3 | 150 | 26 | **419** | TAG54:4-FA18:0 | 900.8 | 599.5 | 150 | 38 |
| **127** | DAG(18:1/22:6) | 684.6 | 339.3 | 150 | 26 | **420** | TAG54:4-FA18:1 | 900.8 | 601.5 | 150 | 38 |
| **128** | DAG(18:2/22:6) | 682.5 | 337.3 | 150 | 26 | **421** | TAG54:4-FA18:2 | 900.8 | 603.5 | 150 | 38 |
| **129** | SM(14:0) | 675.5 | 184.1 | 150 | 43 | **422** | TAG54:4-FA18:3 | 900.8 | 605.5 | 150 | 38 |
| **130** | SM(16:0) | 703.6 | 184.1 | 150 | 43 | **423** | TAG54:4-FA20:1 | 900.8 | 573.5 | 150 | 38 |
| **131** | SM(18:0) | 731.6 | 184.1 | 150 | 43 | **424** | TAG54:4-FA20:2 | 900.8 | 575.5 | 150 | 38 |
| **132** | SM(18:1) | 729.6 | 184.1 | 150 | 43 | **425** | TAG54:4-FA20:3 | 900.8 | 577.5 | 150 | 38 |
| **133** | SM(20:0) | 759.6 | 184.1 | 150 | 43 | **426** | TAG54:4-FA20:4 | 900.8 | 579.5 | 150 | 38 |
| **134** | SM(20:1) | 757.6 | 184.1 | 150 | 43 | **427** | TAG54:4-FA22:4 | 900.8 | 551.503 | 150 | 38 |
| **135** | SM(22:0) | 787.7 | 184.1 | 150 | 43 | **428** | TAG54:5-FA16:0 | 898.8 | 625.5 | 150 | 38 |
| **136** | SM(22:1) | 785.7 | 184.1 | 150 | 43 | **429** | TAG54:5-FA16:1 | 898.8 | 627.5 | 150 | 38 |
| **137** | SM(24:0) | 815.7 | 184.1 | 150 | 43 | **430** | TAG54:5-FA18:0 | 898.8 | 597.5 | 150 | 38 |
| **138** | SM(24:1) | 813.7 | 184.1 | 150 | 43 | **431** | TAG54:5-FA18:1 | 898.8 | 599.5 | 150 | 38 |
| **139** | SM(26:0) | 843.7 | 184.1 | 150 | 43 | **432** | TAG54:5-FA18:2 | 898.8 | 601.5 | 150 | 38 |
| **140** | SM(26:1) | 841.7 | 184.1 | 150 | 25 | **433** | TAG54:5-FA18:3 | 898.8 | 603.5 | 150 | 38 |
| **141** | TAG40:0-FA14:0 | 712.645 | 467.409 | 150 | 38 | **434** | TAG54:5-FA20:2 | 898.8 | 573.5 | 150 | 38 |
| **142** | TAG40:0-FA16:0 | 712.645 | 439.378 | 150 | 38 | **435** | TAG54:5-FA20:3 | 898.8 | 575.5 | 150 | 38 |
| **143** | TAG42:0-FA14:0 | 740.676 | 495.441 | 150 | 38 | **436** | TAG54:5-FA20:4 | 898.8 | 577.5 | 150 | 38 |
| **144** | TAG42:0-FA16:0 | 740.676 | 467.409 | 150 | 38 | **437** | TAG54:5-FA20:5 | 898.8 | 579.5 | 150 | 38 |
| **145** | TAG42:1-FA14:0 | 738.661 | 493.425 | 150 | 38 | **438** | TAG54:5-FA22:4 | 898.8 | 549.5 | 150 | 38 |
| **146** | TAG42:1-FA16:0 | 738.661 | 465.394 | 150 | 38 | **439** | TAG54:5-FA22:5 | 898.8 | 551.503 | 150 | 38 |
| **147** | TAG42:1-FA16:1 | 738.661 | 467.409 | 150 | 38 | **440** | TAG54:6-FA16:0 | 896.8 | 623.5 | 150 | 38 |
| **148** | TAG42:1-FA18:1 | 738.661 | 439.378 | 150 | 38 | **441** | TAG54:6-FA16:1 | 896.8 | 625.5 | 150 | 38 |
| **149** | TAG42:2-FA18:2 | 736.645 | 439.378 | 150 | 38 | **442** | TAG54:6-FA18:1 | 896.8 | 597.5 | 150 | 38 |
| **150** | TAG44:0-FA14:0 | 768.708 | 523.472 | 150 | 38 | **443** | TAG54:6-FA18:2 | 896.8 | 599.5 | 150 | 38 |
| **151** | TAG44:0-FA16:0 | 768.708 | 495.441 | 150 | 38 | **444** | TAG54:6-FA18:3 | 896.8 | 601.5 | 150 | 38 |
| **152** | TAG44:0-FA18:0 | 768.708 | 467.409 | 150 | 38 | **445** | TAG54:6-FA20:3 | 896.8 | 573.5 | 150 | 38 |
| **153** | TAG44:1-FA14:0 | 766.692 | 521.456 | 150 | 38 | **446** | TAG54:6-FA20:4 | 896.8 | 575.5 | 150 | 38 |
| **154** | TAG44:1-FA16:0 | 766.692 | 493.425 | 150 | 38 | **447** | TAG54:6-FA20:5 | 896.8 | 577.5 | 150 | 38 |
| **155** | TAG44:1-FA16:1 | 766.692 | 495.441 | 150 | 38 | **448** | TAG54:6-FA22:5 | 896.8 | 549.5 | 150 | 38 |
| **156** | TAG44:1-FA18:1 | 766.692 | 467.409 | 150 | 38 | **449** | TAG54:6-FA22:6 | 896.8 | 551.503 | 150 | 38 |
| **157** | TAG44:2-FA14:0 | 764.676 | 519.441 | 150 | 38 | **450** | TAG54:7-FA16:1 | 894.8 | 623.5 | 150 | 38 |
| **158** | TAG44:2-FA16:0 | 764.676 | 491.409 | 150 | 38 | **451** | TAG54:7-FA18:1 | 894.8 | 595.5 | 150 | 38 |
| **159** | TAG44:2-FA16:1 | 764.676 | 493.425 | 150 | 38 | **452** | TAG54:7-FA18:2 | 894.8 | 597.5 | 150 | 38 |
| **160** | TAG44:2-FA18:1 | 764.676 | 465.394 | 150 | 38 | **453** | TAG54:7-FA18:3 | 894.8 | 599.5 | 150 | 38 |
| **161** | TAG44:2-FA18:2 | 764.676 | 467.409 | 150 | 38 | **454** | TAG54:7-FA20:4 | 894.8 | 573.5 | 150 | 38 |
| **162** | TAG44:3-FA18:2 | 762.661 | 465.394 | 150 | 38 | **455** | TAG54:7-FA20:5 | 894.8 | 575.5 | 150 | 38 |
| **163** | TAG45:0-FA14:0 | 782.723 | 537.488 | 150 | 38 | **456** | TAG54:7-FA22:5 | 894.8 | 547.5 | 150 | 38 |
| **164** | TAG45:0-FA16:0 | 782.723 | 509.456 | 150 | 38 | **457** | TAG54:7-FA22:6 | 894.8 | 549.5 | 150 | 38 |
| **165** | TAG45:1-FA16:0 | 780.708 | 507.4 | 150 | 38 | **458** | TAG54:8-FA18:2 | 892.8 | 595.5 | 150 | 38 |
| **166** | TAG45:1-FA18:1 | 780.708 | 481.4 | 150 | 38 | **459** | TAG54:8-FA18:3 | 892.8 | 597.5 | 150 | 38 |
| **167** | TAG46:0-FA14:0 | 796.7 | 551.503 | 150 | 38 | **460** | TAG54:8-FA20:4 | 892.8 | 571.5 | 150 | 38 |
| **168** | TAG46:0-FA16:0 | 796.7 | 523.472 | 150 | 38 | **461** | TAG54:8-FA20:5 | 892.8 | 573.5 | 150 | 38 |
| **169** | TAG46:0-FA18:0 | 796.7 | 495.441 | 150 | 38 | **462** | TAG54:8-FA22:6 | 892.8 | 547.5 | 150 | 38 |
| **170** | TAG46:1-FA14:0 | 794.7 | 549.5 | 150 | 38 | **463** | TAG55:1-FA16:0 | 920.9 | 647.6 | 150 | 38 |
| **171** | TAG46:1-FA16:0 | 794.7 | 521.4 | 150 | 38 | **464** | TAG55:1-FA18:1 | 920.9 | 621.6 | 150 | 38 |
| **172** | TAG46:1-FA16:1 | 794.7 | 523.472 | 150 | 38 | **465** | TAG55:2-FA18:1 | 918.8 | 619.5 | 150 | 38 |
| **173** | TAG46:1-FA18:0 | 794.7 | 493.425 | 150 | 38 | **466** | TAG55:2-FA18:2 | 918.8 | 621.5 | 150 | 38 |
| **174** | TAG46:1-FA18:1 | 794.7 | 495.441 | 150 | 38 | **467** | TAG55:3-FA18:1 | 916.8 | 617.5 | 150 | 38 |
| **175** | TAG46:2-FA14:0 | 792.7 | 547.5 | 150 | 38 | **468** | TAG55:3-FA18:2 | 916.8 | 619.5 | 150 | 38 |
| **176** | TAG46:2-FA16:0 | 792.7 | 519.441 | 150 | 38 | **469** | TAG55:4-FA18:1 | 914.8 | 615.5 | 150 | 38 |
| **177** | TAG46:2-FA16:1 | 792.7 | 521.4 | 150 | 38 | **470** | TAG55:4-FA18:2 | 914.8 | 617.5 | 150 | 38 |
| **178** | TAG46:2-FA18:1 | 792.7 | 493.425 | 150 | 38 | **471** | TAG55:5-FA18:1 | 912.8 | 613.5 | 150 | 38 |
| **179** | TAG46:2-FA18:2 | 792.7 | 495.441 | 150 | 38 | **472** | TAG55:5-FA18:2 | 912.8 | 615.5 | 150 | 38 |
| **180** | TAG46:3-FA14:0 | 790.7 | 545.5 | 150 | 38 | **473** | TAG55:5-FA20:4 | 912.8 | 591.5 | 150 | 38 |
| **181** | TAG46:3-FA16:0 | 790.7 | 517.4 | 150 | 38 | **474** | TAG55:7-FA22:6 | 908.8 | 563.5 | 150 | 38 |
| **182** | TAG46:3-FA16:1 | 790.7 | 519.441 | 150 | 38 | **475** | TAG56:10-FA18:2 | 916.7 | 619.4 | 150 | 38 |
| **183** | TAG46:3-FA18:1 | 790.7 | 491.409 | 150 | 38 | **476** | TAG56:1-FA16:0 | 934.9 | 661.6 | 150 | 38 |
| **184** | TAG46:3-FA18:2 | 790.7 | 493.425 | 150 | 38 | **477** | TAG56:1-FA18:1 | 934.9 | 635.6 | 150 | 38 |
| **185** | TAG46:3-FA18:3 | 790.7 | 495.441 | 150 | 38 | **478** | TAG56:2-FA16:0 | 932.9 | 659.6 | 150 | 38 |
| **186** | TAG46:4-FA18:2 | 788.7 | 491.409 | 150 | 38 | **479** | TAG56:2-FA18:0 | 932.9 | 631.6 | 150 | 38 |
| **187** | TAG47:0-FA14:0 | 810.7 | 565.5 | 150 | 38 | **480** | TAG56:2-FA20:0 | 932.9 | 603.6 | 150 | 38 |
| **188** | TAG47:0-FA16:0 | 810.7 | 537.4 | 150 | 38 | **481** | TAG56:2-FA20:1 | 932.9 | 605.6 | 150 | 38 |
| **189** | TAG47:0-FA17:0 | 810.7 | 523.472 | 150 | 38 | **482** | TAG56:3-FA16:0 | 930.8 | 657.5 | 150 | 38 |
| **190** | TAG47:1-FA14:0 | 808.7 | 563.5 | 150 | 38 | **483** | TAG56:3-FA18:0 | 930.8 | 629.5 | 150 | 38 |
| **191** | TAG47:1-FA16:0 | 808.7 | 535.4 | 150 | 38 | **484** | TAG56:3-FA18:1 | 930.8 | 631.5 | 150 | 38 |
| **192** | TAG47:1-FA16:1 | 808.7 | 537.4 | 150 | 38 | **485** | TAG56:3-FA18:2 | 930.8 | 633.5 | 150 | 38 |
| **193** | TAG47:1-FA17:0 | 808.7 | 521.4 | 150 | 38 | **486** | TAG56:3-FA20:0 | 930.8 | 601.5 | 150 | 38 |
| **194** | TAG47:1-FA18:1 | 808.7 | 509.4 | 150 | 38 | **487** | TAG56:3-FA20:1 | 930.8 | 603.5 | 150 | 38 |
| **195** | TAG47:2-FA14:0 | 806.7 | 561.5 | 150 | 38 | **488** | TAG56:3-FA20:2 | 930.8 | 605.5 | 150 | 38 |
| **196** | TAG47:2-FA16:1 | 806.7 | 535.4 | 150 | 38 | **489** | TAG56:4-FA16:0 | 928.8 | 655.5 | 150 | 38 |
| **197** | TAG47:2-FA18:1 | 806.7 | 507.4 | 150 | 38 | **490** | TAG56:4-FA18:0 | 928.8 | 627.5 | 150 | 38 |
| **198** | TAG47:2-FA18:2 | 806.7 | 509.4 | 150 | 38 | **491** | TAG56:4-FA18:1 | 928.8 | 629.5 | 150 | 38 |
| **199** | TAG48:0-FA14:0 | 824.7 | 579.5 | 150 | 38 | **492** | TAG56:4-FA18:2 | 928.8 | 631.5 | 150 | 38 |
| **200** | TAG48:0-FA16:0 | 824.7 | 551.4 | 150 | 38 | **493** | TAG56:4-FA20:1 | 928.8 | 601.5 | 150 | 38 |
| **201** | TAG48:0-FA18:0 | 824.7 | 523.472 | 150 | 38 | **494** | TAG56:4-FA20:2 | 928.8 | 603.5 | 150 | 38 |
| **202** | TAG48:1-FA14:0 | 822.7 | 577.5 | 150 | 38 | **495** | TAG56:4-FA20:3 | 928.8 | 605.5 | 150 | 38 |
| **203** | TAG48:1-FA16:0 | 822.7 | 549.4 | 150 | 38 | **496** | TAG56:4-FA20:4 | 928.8 | 607.5 | 150 | 38 |
| **204** | TAG48:1-FA16:1 | 822.7 | 551.4 | 150 | 38 | **497** | TAG56:4-FA22:4 | 928.8 | 579.5 | 150 | 38 |
| **205** | TAG48:1-FA18:0 | 822.7 | 521.4 | 150 | 38 | **498** | TAG56:5-FA16:0 | 926.8 | 653.5 | 150 | 38 |
| **206** | TAG48:1-FA18:1 | 822.7 | 523.472 | 150 | 38 | **499** | TAG56:5-FA18:0 | 926.8 | 625.5 | 150 | 38 |
| **207** | TAG48:2-FA14:0 | 820.7 | 575.5 | 150 | 38 | **500** | TAG56:5-FA18:1 | 926.8 | 627.5 | 150 | 38 |
| **208** | TAG48:2-FA16:0 | 820.7 | 547.4 | 150 | 38 | **501** | TAG56:5-FA18:2 | 926.8 | 629.5 | 150 | 38 |
| **209** | TAG48:2-FA16:1 | 820.7 | 549.4 | 150 | 38 | **502** | TAG56:5-FA20:1 | 926.8 | 599.5 | 150 | 38 |
| **210** | TAG48:2-FA18:0 | 820.7 | 519.441 | 150 | 38 | **503** | TAG56:5-FA20:2 | 926.8 | 601.5 | 150 | 38 |
| **211** | TAG48:2-FA18:1 | 820.7 | 521.4 | 150 | 38 | **504** | TAG56:5-FA20:3 | 926.8 | 603.5 | 150 | 38 |
| **212** | TAG48:2-FA18:2 | 820.7 | 523.472 | 150 | 38 | **505** | TAG56:5-FA20:4 | 926.8 | 605.5 | 150 | 38 |
| **213** | TAG48:3-FA14:0 | 818.7 | 573.5 | 150 | 38 | **506** | TAG56:5-FA22:4 | 926.8 | 577.5 | 150 | 38 |
| **214** | TAG48:3-FA16:0 | 818.7 | 545.4 | 150 | 38 | **507** | TAG56:5-FA22:5 | 926.8 | 579.5 | 150 | 38 |
| **215** | TAG48:3-FA16:1 | 818.7 | 547.4 | 150 | 38 | **508** | TAG56:6-FA16:0 | 924.8 | 651.5 | 150 | 38 |
| **216** | TAG48:3-FA18:1 | 818.7 | 519.441 | 150 | 38 | **509** | TAG56:6-FA18:0 | 924.8 | 623.5 | 150 | 38 |
| **217** | TAG48:3-FA18:2 | 818.7 | 521.4 | 150 | 38 | **510** | TAG56:6-FA18:1 | 924.8 | 625.5 | 150 | 38 |
| **218** | TAG48:3-FA18:3 | 818.7 | 523.472 | 150 | 38 | **511** | TAG56:6-FA18:2 | 924.8 | 627.5 | 150 | 38 |
| **219** | TAG48:4-FA14:0 | 816.7 | 571.5 | 150 | 38 | **512** | TAG56:6-FA18:3 | 924.8 | 629.5 | 150 | 38 |
| **220** | TAG48:4-FA16:0 | 816.7 | 543.4 | 150 | 38 | **513** | TAG56:6-FA20:2 | 924.8 | 599.5 | 150 | 38 |
| **221** | TAG48:4-FA16:1 | 816.7 | 545.4 | 150 | 38 | **514** | TAG56:6-FA20:3 | 924.8 | 601.5 | 150 | 38 |
| **222** | TAG48:4-FA18:1 | 816.7 | 517.4 | 150 | 38 | **515** | TAG56:6-FA20:4 | 924.8 | 603.5 | 150 | 38 |
| **223** | TAG48:4-FA18:2 | 816.7 | 519.441 | 150 | 38 | **516** | TAG56:6-FA20:5 | 924.8 | 605.5 | 150 | 38 |
| **224** | TAG48:4-FA18:3 | 816.7 | 521.4 | 150 | 38 | **517** | TAG56:6-FA22:4 | 924.8 | 575.5 | 150 | 38 |
| **225** | TAG48:4-FA20:4 | 816.7 | 495.441 | 150 | 38 | **518** | TAG56:6-FA22:5 | 924.8 | 577.5 | 150 | 38 |
| **226** | TAG48:5-FA18:2 | 814.7 | 517.4 | 150 | 38 | **519** | TAG56:6-FA22:6 | 924.8 | 579.5 | 150 | 38 |
| **227** | TAG48:5-FA18:3 | 814.7 | 519.441 | 150 | 38 | **520** | TAG56:7-FA16:0 | 922.8 | 649.5 | 150 | 38 |
| **228** | TAG49:0-FA16:0 | 838.8 | 565.5 | 150 | 38 | **521** | TAG56:7-FA16:1 | 922.8 | 651.5 | 150 | 38 |
| **229** | TAG49:0-FA17:0 | 838.8 | 551.503 | 150 | 38 | **522** | TAG56:7-FA18:0 | 922.8 | 621.5 | 150 | 38 |
| **230** | TAG49:0-FA18:0 | 838.8 | 537.5 | 150 | 38 | **523** | TAG56:7-FA18:1 | 922.8 | 623.5 | 150 | 38 |
| **231** | TAG49:1-FA14:0 | 836.8 | 591.6 | 150 | 38 | **524** | TAG56:7-FA18:2 | 922.8 | 625.5 | 150 | 38 |
| **232** | TAG49:1-FA16:0 | 836.8 | 563.5 | 150 | 38 | **525** | TAG56:7-FA18:3 | 922.8 | 627.5 | 150 | 38 |
| **233** | TAG49:1-FA16:1 | 836.8 | 565.5 | 150 | 38 | **526** | TAG56:7-FA20:3 | 922.8 | 599.5 | 150 | 38 |
| **234** | TAG49:1-FA17:0 | 836.8 | 549.5 | 150 | 38 | **527** | TAG56:7-FA20:4 | 922.8 | 601.5 | 150 | 38 |
| **235** | TAG49:1-FA18:1 | 836.8 | 537.5 | 150 | 38 | **528** | TAG56:7-FA20:5 | 922.8 | 603.5 | 150 | 38 |
| **236** | TAG49:2-FA14:0 | 834.8 | 589.6 | 150 | 38 | **529** | TAG56:7-FA22:4 | 922.8 | 573.5 | 150 | 38 |
| **237** | TAG49:2-FA16:0 | 834.8 | 561.5 | 150 | 38 | **530** | TAG56:7-FA22:5 | 922.8 | 575.5 | 150 | 38 |
| **238** | TAG49:2-FA16:1 | 834.8 | 563.5 | 150 | 38 | **531** | TAG56:7-FA22:6 | 922.8 | 577.5 | 150 | 38 |
| **239** | TAG49:2-FA17:0 | 834.8 | 547.5 | 150 | 38 | **532** | TAG56:8-FA16:0 | 920.8 | 647.5 | 150 | 38 |
| **240** | TAG49:2-FA18:1 | 834.8 | 535.5 | 150 | 38 | **533** | TAG56:8-FA16:1 | 920.8 | 649.5 | 150 | 38 |
| **241** | TAG49:2-FA18:2 | 834.8 | 537.5 | 150 | 38 | **534** | TAG56:8-FA18:1 | 920.8 | 621.5 | 150 | 38 |
| **242** | TAG49:3-FA16:0 | 832.8 | 559.5 | 150 | 38 | **535** | TAG56:8-FA18:2 | 920.8 | 623.5 | 150 | 38 |
| **243** | TAG49:3-FA16:1 | 832.8 | 561.5 | 150 | 38 | **536** | TAG56:8-FA18:3 | 920.8 | 625.5 | 150 | 38 |
| **244** | TAG49:3-FA18:2 | 832.8 | 535.5 | 150 | 38 | **537** | TAG56:8-FA20:4 | 920.8 | 599.5 | 150 | 38 |
| **245** | TAG49:3-FA18:3 | 832.8 | 537.5 | 150 | 38 | **538** | TAG56:8-FA20:5 | 920.8 | 601.5 | 150 | 38 |
| **246** | TAG50:0-FA14:0 | 852.8 | 607.6 | 150 | 38 | **539** | TAG56:8-FA22:5 | 920.8 | 573.5 | 150 | 38 |
| **247** | TAG50:0-FA16:0 | 852.8 | 579.5 | 150 | 38 | **540** | TAG56:8-FA22:6 | 920.8 | 575.5 | 150 | 38 |
| **248** | TAG50:0-FA18:0 | 852.8 | 551.503 | 150 | 38 | **541** | TAG56:9-FA18:3 | 918.8 | 623.5 | 150 | 38 |
| **249** | TAG50:1-FA14:0 | 850.8 | 605.6 | 150 | 38 | **542** | TAG56:9-FA20:4 | 918.8 | 597.5 | 150 | 38 |
| **250** | TAG50:1-FA16:0 | 850.8 | 577.5 | 150 | 38 | **543** | TAG56:9-FA20:5 | 918.8 | 599.5 | 150 | 38 |
| **251** | TAG50:1-FA16:1 | 850.8 | 579.5 | 150 | 38 | **544** | TAG56:9-FA22:6 | 918.8 | 573.5 | 150 | 38 |
| **252** | TAG50:1-FA18:0 | 850.8 | 549.5 | 150 | 38 | **545** | TAG57:10-FA22:6 | 928.7 | 583.4 | 150 | 38 |
| **253** | TAG50:1-FA18:1 | 850.8 | 551.503 | 150 | 38 | **546** | TAG57:2-FA18:1 | 946.9 | 647.6 | 150 | 38 |
| **254** | TAG50:1-FA20:1 | 850.8 | 523.472 | 150 | 38 | **547** | TAG57:3-FA18:2 | 944.9 | 647.6 | 150 | 38 |
| **255** | TAG50:2-FA14:0 | 848.8 | 603.6 | 150 | 38 | **548** | TAG58:10-FA18:2 | 944.8 | 647.5 | 150 | 38 |
| **256** | TAG50:2-FA16:0 | 848.8 | 575.5 | 150 | 38 | **549** | TAG58:10-FA20:4 | 944.8 | 623.5 | 150 | 38 |
| **257** | TAG50:2-FA16:1 | 848.8 | 577.5 | 150 | 38 | **550** | TAG58:10-FA20:5 | 944.8 | 625.5 | 150 | 38 |
| **258** | TAG50:2-FA18:0 | 848.8 | 547.5 | 150 | 38 | **551** | TAG58:10-FA22:5 | 944.8 | 597.5 | 150 | 38 |
| **259** | TAG50:2-FA18:1 | 848.8 | 549.5 | 150 | 38 | **552** | TAG58:10-FA22:6 | 944.8 | 599.5 | 150 | 38 |
| **260** | TAG50:2-FA18:2 | 848.8 | 551.503 | 150 | 38 | **553** | TAG58:2-FA18:1 | 960.9 | 661.6 | 150 | 38 |
| **261** | TAG50:2-FA20:2 | 848.8 | 523.472 | 150 | 38 | **554** | TAG58:3-FA18:1 | 958.9 | 659.6 | 150 | 38 |
| **262** | TAG50:3-FA14:0 | 846.8 | 601.6 | 150 | 38 | **555** | TAG58:5-FA18:1 | 954.9 | 655.6 | 150 | 38 |
| **263** | TAG50:3-FA16:0 | 846.8 | 573.5 | 150 | 38 | **556** | TAG58:6-FA16:0 | 952.8 | 679.5 | 150 | 38 |
| **264** | TAG50:3-FA16:1 | 846.8 | 575.5 | 150 | 38 | **557** | TAG58:6-FA18:0 | 952.8 | 651.5 | 150 | 38 |
| **265** | TAG50:3-FA18:0 | 846.8 | 545.5 | 150 | 38 | **558** | TAG58:6-FA18:1 | 952.8 | 653.5 | 150 | 38 |
| **266** | TAG50:3-FA18:1 | 846.8 | 547.5 | 150 | 38 | **559** | TAG58:6-FA20:4 | 952.8 | 631.5 | 150 | 38 |
| **267** | TAG50:3-FA18:2 | 846.8 | 549.5 | 150 | 38 | **560** | TAG58:6-FA22:4 | 952.8 | 603.5 | 150 | 38 |
| **268** | TAG50:3-FA18:3 | 846.8 | 551.503 | 150 | 38 | **561** | TAG58:6-FA22:5 | 952.8 | 605.5 | 150 | 38 |
| **269** | TAG50:3-FA20:3 | 846.8 | 523.472 | 150 | 38 | **562** | TAG58:7-FA16:0 | 950.8 | 677.5 | 150 | 38 |
| **270** | TAG50:4-FA14:0 | 844.6 | 599.4 | 150 | 38 | **563** | TAG58:7-FA18:0 | 950.8 | 649.5 | 150 | 38 |
| **271** | TAG50:4-FA16:0 | 844.6 | 571.3 | 150 | 38 | **564** | TAG58:7-FA18:1 | 950.8 | 651.5 | 150 | 38 |
| **272** | TAG50:4-FA16:1 | 844.6 | 573.3 | 150 | 38 | **565** | TAG58:7-FA18:2 | 950.8 | 653.5 | 150 | 38 |
| **273** | TAG50:4-FA18:1 | 844.6 | 545.3 | 150 | 38 | **566** | TAG58:7-FA20:4 | 950.8 | 629.5 | 150 | 38 |
| **274** | TAG50:4-FA18:2 | 844.6 | 547.3 | 150 | 38 | **567** | TAG58:7-FA22:4 | 950.8 | 601.5 | 150 | 38 |
| **275** | TAG50:4-FA18:3 | 844.6 | 549.3 | 150 | 38 | **568** | TAG58:7-FA22:5 | 950.8 | 603.5 | 150 | 38 |
| **276** | TAG50:4-FA20:3 | 844.6 | 521.3 | 150 | 38 | **569** | TAG58:7-FA22:6 | 950.8 | 605.5 | 150 | 38 |
| **277** | TAG50:4-FA20:4 | 844.6 | 523.3 | 150 | 38 | **570** | TAG58:8-FA18:1 | 948.8 | 649.5 | 150 | 38 |
| **278** | TAG50:5-FA14:0 | 842.6 | 597.4 | 150 | 38 | **571** | TAG58:8-FA18:2 | 948.8 | 651.5 | 150 | 38 |
| **279** | TAG50:5-FA16:0 | 842.6 | 569.3 | 150 | 38 | **572** | TAG58:8-FA20:3 | 948.8 | 625.5 | 150 | 38 |
| **280** | TAG50:5-FA16:1 | 842.6 | 571.3 | 150 | 38 | **573** | TAG58:8-FA20:4 | 948.8 | 627.5 | 150 | 38 |
| **281** | TAG50:5-FA18:1 | 842.6 | 543.3 | 150 | 38 | **574** | TAG58:8-FA22:5 | 948.8 | 601.5 | 150 | 38 |
| **282** | TAG50:5-FA18:2 | 842.6 | 545.3 | 150 | 38 | **575** | TAG58:8-FA22:6 | 948.8 | 603.5 | 150 | 38 |
| **283** | TAG50:5-FA18:3 | 842.6 | 547.3 | 150 | 38 | **576** | TAG58:9-FA18:1 | 946.8 | 647.5 | 150 | 38 |
| **284** | TAG50:5-FA20:4 | 842.6 | 521.3 | 150 | 38 | **577** | TAG58:9-FA18:2 | 946.8 | 649.5 | 150 | 38 |
| **285** | TAG50:5-FA20:5 | 842.6 | 523.3 | 150 | 38 | **578** | TAG58:9-FA20:4 | 946.8 | 625.5 | 150 | 38 |
| **286** | TAG50:6-FA20:4 | 840.7 | 519.441 | 150 | 38 | **579** | TAG58:9-FA22:5 | 946.8 | 599.5 | 150 | 38 |
| **287** | TAG51:0-FA16:0 | 866.8 | 593.5 | 150 | 38 | **580** | TAG58:9-FA22:6 | 946.8 | 601.5 | 150 | 38 |
| **288** | TAG51:0-FA17:0 | 866.8 | 579.5 | 150 | 38 | **581** | TAG60:10-FA22:5 | 972.8 | 625.5 | 150 | 38 |
| **289** | TAG51:0-FA18:0 | 866.8 | 565.5 | 150 | 38 | **582** | TAG60:10-FA22:6 | 972.8 | 627.5 | 150 | 38 |
| **290** | TAG51:1-FA16:0 | 864.8 | 591.5 | 150 | 38 | **583** | TAG60:11-FA22:5 | 970.8 | 623.5 | 150 | 38 |
| **291** | TAG51:1-FA17:0 | 864.8 | 577.5 | 150 | 38 | **584** | TAG60:11-FA22:6 | 970.8 | 625.5 | 150 | 38 |
| **292** | TAG51:1-FA18:0 | 864.8 | 563.5 | 150 | 38 | **585** | TAG60:12-FA22:6 | 968.8 | 623.5 | 150 | 38 |
| **293** | TAG51:1-FA18:1 | 864.8 | 565.5 | 150 | 38 |  |  |  |  |  |  |

Table S2 MS parameters of lipid metabolites in Negtive mode

|  | Name | Q1 | Q3 | DP | CE |  | Name | Q1 | Q3 | DP | CE |
| --- | --- | --- | --- | --- | --- | --- | --- | --- | --- | --- | --- |
| **1** | LPA(16:0) | 409.236 | 255.233 | -80 | -50 | **290** | PE(P-16:0/18:2) | 698.5 | 279.233 | -80 | -50 |
| **2** | LPA(18:1) | 435.252 | 281.249 | -80 | -50 | **291** | PE(P-16:0/18:3) | 696.5 | 277.217 | -80 | -50 |
| **3** | LPA(18:2) | 433.236 | 279.233 | -80 | -50 | **292** | PE(P-16:0/20:1) | 728.6 | 309.28 | -80 | -50 |
| **4** | PA(14:0/14:0) | 591.403 | 227.202 | -80 | -50 | **293** | PE(P-16:0/20:2) | 726.5 | 307.264 | -80 | -50 |
| **5** | PA(14:0/18:1) | 645.45 | 281.249 | -80 | -50 | **294** | PE(P-16:0/20:3) | 724.5 | 305.249 | -80 | -50 |
| **6** | PA(14:0/18:2) | 643.434 | 279.233 | -80 | -50 | **295** | PE(P-16:0/20:4) | 722.5 | 303.233 | -80 | -50 |
| **7** | PA(14:0/18:3) | 641.419 | 277.217 | -80 | -50 | **296** | PE(P-16:0/20:5) | 720.5 | 301.217 | -80 | -50 |
| **8** | PA(14:0/20:1) | 673.481 | 309.28 | -80 | -50 | **297** | PE(P-16:0/22:4) | 750.5 | 331.264 | -80 | -50 |
| **9** | PA(14:0/20:2) | 671.466 | 307.264 | -80 | -50 | **298** | PE(P-16:0/22:5) | 748.5 | 329.249 | -80 | -50 |
| **10** | PA(14:0/20:3) | 669.45 | 305.249 | -80 | -50 | **299** | PE(P-16:0/22:6) | 746.5 | 327.233 | -80 | -50 |
| **11** | PA(14:0/20:4) | 667.434 | 303.233 | -80 | -50 | **300** | PE(P-16:1/18:1) | 698.5 | 281.249 | -80 | -50 |
| **12** | PA(14:0/20:5) | 665.419 | 301.217 | -80 | -50 | **301** | PE(P-18:0/16:0) | 702.5 | 255.233 | -80 | -50 |
| **13** | PA(14:0/22:4) | 695.466 | 331.264 | -80 | -50 | **302** | PE(P-18:0/16:1) | 700.5 | 253.217 | -80 | -50 |
| **14** | PA(14:0/22:5) | 693.45 | 329.249 | -80 | -50 | **303** | PE(P-18:0/18:0) | 730.6 | 283.264 | -80 | -50 |
| **15** | PA(14:0/22:6) | 691.434 | 327.233 | -80 | -50 | **304** | PE(P-18:0/18:1) | 728.6 | 281.249 | -80 | -50 |
| **16** | PA(16:0/14:0) | 619.434 | 227.202 | -80 | -50 | **305** | PE(P-18:0/18:2) | 726.5 | 279.233 | -80 | -50 |
| **17** | PA(16:0/16:0) | 647.466 | 255.233 | -80 | -50 | **306** | PE(P-18:0/18:3) | 724.5 | 277.217 | -80 | -50 |
| **18** | PA(16:0/16:1) | 645.45 | 253.217 | -80 | -50 | **307** | PE(P-18:0/20:1) | 756.6 | 309.28 | -80 | -50 |
| **19** | PA(16:0/18:0) | 675.497 | 283.264 | -80 | -50 | **308** | PE(P-18:0/20:2) | 754.6 | 307.264 | -80 | -50 |
| **20** | PA(16:0/18:1) | 673.481 | 281.249 | -80 | -50 | **309** | PE(P-18:0/20:3) | 752.6 | 305.249 | -80 | -50 |
| **21** | PA(16:0/18:2) | 671.466 | 279.233 | -80 | -50 | **310** | PE(P-18:0/20:4) | 750.5 | 303.233 | -80 | -50 |
| **22** | PA(16:0/18:3) | 669.45 | 277.217 | -80 | -50 | **311** | PE(P-18:0/20:5) | 748.5 | 301.217 | -80 | -50 |
| **23** | PA(16:0/20:1) | 701.513 | 309.28 | -80 | -50 | **312** | PE(P-18:0/22:4) | 778.6 | 331.264 | -80 | -50 |
| **24** | PA(16:0/20:2) | 699.497 | 307.264 | -80 | -50 | **313** | PE(P-18:0/22:5) | 776.6 | 329.249 | -80 | -50 |
| **25** | PA(16:0/20:3) | 697.481 | 305.249 | -80 | -50 | **314** | PE(P-18:0/22:6) | 774.5 | 327.233 | -80 | -50 |
| **26** | PA(16:0/20:4) | 695.466 | 303.233 | -80 | -50 | **315** | PE(P-18:1/16:0) | 700.5 | 255.233 | -80 | -50 |
| **27** | PA(16:0/20:5) | 693.45 | 301.217 | -80 | -50 | **316** | PE(P-18:1/16:1) | 698.5 | 253.217 | -80 | -50 |
| **28** | PA(16:0/22:4) | 723.497 | 331.264 | -80 | -50 | **317** | PE(P-18:1/18:0) | 728.6 | 283.2 | -80 | -50 |
| **29** | PA(16:0/22:5) | 721.481 | 329.249 | -80 | -50 | **318** | PE(P-18:1/18:1) | 726.5 | 281.249 | -80 | -50 |
| **30** | PA(16:0/22:6) | 719.466 | 327.233 | -80 | -50 | **319** | PE(P-18:1/18:2) | 724.5 | 279.233 | -80 | -50 |
| **31** | PA(18:0/14:0) | 647.466 | 227.202 | -80 | -50 | **320** | PE(P-18:1/18:3) | 722.5 | 277.217 | -80 | -50 |
| **32** | PA(18:0/16:1) | 673.481 | 253.217 | -80 | -50 | **321** | PE(P-18:1/20:1) | 754.6 | 309.28 | -80 | -50 |
| **33** | PA(18:0/18:0) | 703.528 | 283.264 | -80 | -50 | **322** | PE(P-18:1/20:2) | 752.6 | 307.264 | -80 | -50 |
| **34** | PA(18:0/18:1) | 701.513 | 281.249 | -80 | -50 | **323** | PE(P-18:1/20:3) | 750.5 | 305.249 | -80 | -50 |
| **35** | PA(18:0/18:2) | 699.497 | 279.233 | -80 | -50 | **324** | PE(P-18:1/20:4) | 748.5 | 303.233 | -80 | -50 |
| **36** | PA(18:0/18:3) | 697.481 | 277.217 | -80 | -50 | **325** | PE(P-18:1/20:5) | 746.5 | 301.217 | -80 | -50 |
| **37** | PA(18:0/20:0) | 731.56 | 283.264 | -80 | -50 | **326** | PE(P-18:1/22:4) | 776.6 | 331.264 | -80 | -50 |
| **38** | PA(18:0/20:1) | 729.544 | 309.28 | -80 | -50 | **327** | PE(P-18:1/22:5) | 774.5 | 329.249 | -80 | -50 |
| **39** | PA(18:0/20:2) | 727.528 | 307.264 | -80 | -50 | **328** | PE(P-18:1/22:6) | 772.5 | 327.233 | -80 | -50 |
| **40** | PA(18:0/20:3) | 725.513 | 305.249 | -80 | -50 | **329** | PE(P-18:2/18:2) | 722.5 | 279.233 | -80 | -50 |
| **41** | PA(18:0/20:4) | 723.497 | 303.233 | -80 | -50 | **330** | PE(P-18:2/20:4) | 746.5 | 303.233 | -80 | -50 |
| **42** | PA(18:0/20:5) | 721.481 | 301.217 | -80 | -50 | **331** | PE(P-18:2/22:6) | 770.5 | 327.233 | -80 | -50 |
| **43** | PA(18:0/22:4) | 751.528 | 331.264 | -80 | -50 | **332** | PG(14:0/14:0) | 665.44 | 227.202 | -80 | -50 |
| **44** | PA(18:0/22:5) | 749.513 | 329.249 | -80 | -50 | **333** | PG(14:0/18:1) | 719.487 | 281.249 | -80 | -50 |
| **45** | PA(18:0/22:6) | 747.497 | 327.233 | -80 | -50 | **334** | PG(14:0/18:2) | 717.471 | 279.233 | -80 | -50 |
| **46** | PA(18:1/16:1) | 671.466 | 281.249 | -80 | -50 | **335** | PG(14:0/18:3) | 715.456 | 277.217 | -80 | -50 |
| **47** | PA(18:1/18:1) | 699.497 | 281.249 | -80 | -50 | **336** | PG(14:0/20:1) | 747.518 | 309.28 | -80 | -50 |
| **48** | PA(18:1/18:2) | 697.481 | 279.233 | -80 | -50 | **337** | PG(14:0/20:2) | 745.503 | 307.264 | -80 | -50 |
| **49** | PA(18:1/18:3) | 695.466 | 277.217 | -80 | -50 | **338** | PG(14:0/20:3) | 743.487 | 305.249 | -80 | -50 |
| **50** | PA(18:1/20:1) | 727.528 | 309.28 | -80 | -50 | **339** | PG(14:0/20:4) | 741.471 | 303.233 | -80 | -50 |
| **51** | PA(18:1/20:2) | 725.513 | 307.264 | -80 | -50 | **340** | PG(14:0/20:5) | 739.456 | 301.217 | -80 | -50 |
| **52** | PA(18:1/20:3) | 723.497 | 305.249 | -80 | -50 | **341** | PG(14:0/22:4) | 769.503 | 331.264 | -80 | -50 |
| **53** | PA(18:1/20:4) | 721.481 | 303.233 | -80 | -50 | **342** | PG(14:0/22:5) | 767.487 | 329.249 | -80 | -50 |
| **54** | PA(18:1/20:5) | 719.466 | 301.217 | -80 | -50 | **343** | PG(14:0/22:6) | 765.471 | 327.233 | -80 | -50 |
| **55** | PA(18:1/22:4) | 749.513 | 331.264 | -80 | -50 | **344** | PG(16:0/14:0) | 693.471 | 227.202 | -80 | -50 |
| **56** | PA(18:1/22:5) | 747.497 | 329.249 | -80 | -50 | **345** | PG(16:0/16:0) | 721.503 | 255.233 | -80 | -50 |
| **57** | PA(18:1/22:6) | 745.481 | 327.233 | -80 | -50 | **346** | PG(16:0/16:1) | 719.487 | 253.217 | -80 | -50 |
| **58** | PA(18:2/16:1) | 669.45 | 279.233 | -80 | -50 | **347** | PG(16:0/18:0) | 749.534 | 283.264 | -80 | -50 |
| **59** | PA(18:2/18:2) | 695.466 | 279.233 | -80 | -50 | **348** | PG(16:0/18:1) | 747.518 | 281.249 | -80 | -50 |
| **60** | PA(18:2/18:3) | 693.45 | 277.217 | -80 | -50 | **349** | PG(16:0/18:2) | 745.503 | 279.233 | -80 | -50 |
| **61** | PA(18:2/20:1) | 725.513 | 309.28 | -80 | -50 | **350** | PG(16:0/18:3) | 743.487 | 277.217 | -80 | -50 |
| **62** | PA(18:2/20:2) | 723.497 | 307.264 | -80 | -50 | **351** | PG(16:0/20:1) | 775.549 | 309.28 | -80 | -50 |
| **63** | PA(18:2/20:3) | 721.481 | 305.249 | -80 | -50 | **352** | PG(16:0/20:2) | 773.534 | 307.264 | -80 | -50 |
| **64** | PA(18:2/20:4) | 719.466 | 303.233 | -80 | -50 | **353** | PG(16:0/20:3) | 771.518 | 305.249 | -80 | -50 |
| **65** | PA(18:2/20:5) | 717.45 | 301.217 | -80 | -50 | **354** | PG(16:0/20:4) | 769.503 | 303.233 | -80 | -50 |
| **66** | PA(18:2/22:4) | 747.497 | 331.264 | -80 | -50 | **355** | PG(16:0/20:5) | 767.487 | 301.217 | -80 | -50 |
| **67** | PA(18:2/22:5) | 745.481 | 329.249 | -80 | -50 | **356** | PG(16:0/22:4) | 797.534 | 331.264 | -80 | -50 |
| **68** | PA(18:2/22:6) | 743.466 | 327.233 | -80 | -50 | **357** | PG(16:0/22:5) | 795.518 | 329.249 | -80 | -50 |
| **69** | PA(20:0/16:1) | 701.513 | 253.217 | -80 | -50 | **358** | PG(16:0/22:6) | 793.503 | 327.233 | -80 | -50 |
| **70** | PA(20:0/18:1) | 729.544 | 281.249 | -80 | -50 | **359** | PG(18:0/14:0) | 721.503 | 227.202 | -80 | -50 |
| **71** | PA(20:0/18:2) | 727.528 | 279.233 | -80 | -50 | **360** | PG(18:0/16:1) | 747.518 | 253.217 | -80 | -50 |
| **72** | PA(20:0/18:3) | 725.513 | 277.217 | -80 | -50 | **361** | PG(18:0/18:0) | 777.565 | 283.264 | -80 | -50 |
| **73** | PA(20:0/20:1) | 757.575 | 309.28 | -80 | -50 | **362** | PG(18:0/18:1) | 775.549 | 281.249 | -80 | -50 |
| **74** | PA(20:0/20:2) | 755.56 | 307.264 | -80 | -50 | **363** | PG(18:0/18:2) | 773.534 | 279.233 | -80 | -50 |
| **75** | PA(20:0/20:3) | 753.544 | 305.249 | -80 | -50 | **364** | PG(18:0/18:3) | 771.518 | 277.217 | -80 | -50 |
| **76** | PA(20:0/20:4) | 751.528 | 303.233 | -80 | -50 | **365** | PG(18:0/20:0) | 805.596 | 283.264 | -80 | -50 |
| **77** | PA(20:0/20:5) | 749.513 | 301.217 | -80 | -50 | **366** | PG(18:0/20:1) | 803.581 | 309.28 | -80 | -50 |
| **78** | PA(20:0/22:4) | 779.56 | 331.264 | -80 | -50 | **367** | PG(18:0/20:2) | 801.565 | 307.264 | -80 | -50 |
| **79** | PA(20:0/22:5) | 777.544 | 329.249 | -80 | -50 | **368** | PG(18:0/20:3) | 799.549 | 305.249 | -80 | -50 |
| **80** | PA(20:0/22:6) | 775.528 | 327.233 | -80 | -50 | **369** | PG(18:0/20:4) | 797.534 | 303.233 | -80 | -50 |
| **81** | LPC(14:0) +AcO | 526.317 | 227.202 | -80 | -43 | **370** | PG(18:0/20:5) | 795.518 | 301.217 | -80 | -50 |
| **82** | LPC(16:0) +AcO | 554.346 | 255.233 | -80 | -50 | **371** | PG(18:0/22:4) | 825.565 | 331.264 | -80 | -50 |
| **83** | LPC(16:1) +AcO | 552.331 | 253.217 | -80 | -50 | **372** | PG(18:0/22:5) | 823.549 | 329.249 | -80 | -50 |
| **84** | LPC(18:0) +AcO | 582.378 | 283.264 | -80 | -50 | **373** | PG(18:0/22:6) | 821.534 | 327.233 | -80 | -50 |
| **85** | LPC(18:1) +AcO | 580.362 | 281.249 | -80 | -50 | **374** | PG(18:1/16:1) | 745.503 | 281.249 | -80 | -50 |
| **86** | LPC(18:2) +AcO | 578.346 | 279.233 | -80 | -50 | **375** | PG(18:1/18:1) | 773.534 | 281.249 | -80 | -50 |
| **87** | LPC(18:3) +AcO | 576.331 | 277.217 | -80 | -50 | **376** | PG(18:1/18:2) | 771.518 | 279.233 | -80 | -50 |
| **88** | LPC(20:0) +AcO | 610.409 | 311.3 | -80 | -50 | **377** | PG(18:1/18:3) | 769.503 | 277.217 | -80 | -50 |
| **89** | LPC(20:1) +AcO | 608.393 | 309.28 | -80 | -50 | **378** | PG(18:1/20:1) | 801.565 | 309.28 | -80 | -50 |
| **90** | LPC(20:2) +AcO | 606.378 | 307.264 | -80 | -50 | **379** | PG(18:1/20:2) | 799.549 | 307.264 | -80 | -50 |
| **91** | LPC(20:3) +AcO | 604.362 | 305.249 | -80 | -50 | **380** | PG(18:1/20:3) | 797.534 | 305.249 | -80 | -50 |
| **92** | LPC(20:4) +AcO | 602.346 | 303.233 | -80 | -50 | **381** | PG(18:1/20:4) | 795.518 | 303.233 | -80 | -50 |
| **93** | LPC(20:5) +AcO | 600.331 | 301.217 | -80 | -50 | **382** | PG(18:1/20:5) | 793.503 | 301.217 | -80 | -50 |
| **94** | LPC(22:4) +AcO | 630.364 | 331.264 | -80 | -50 | **383** | PG(18:1/22:4) | 823.549 | 331.264 | -80 | -50 |
| **95** | LPC(22:5) +AcO | 628.362 | 329.249 | -80 | -50 | **384** | PG(18:1/22:5) | 821.534 | 329.249 | -80 | -50 |
| **96** | LPC(22:6) +AcO | 626.346 | 327.233 | -80 | -50 | **385** | PG(18:1/22:6) | 819.518 | 327.233 | -80 | -50 |
| **97** | PC(14:0/14:0)+AcO | 736.513 | 227.202 | -80 | -50 | **386** | PG(18:2/16:1) | 743.487 | 279.233 | -80 | -50 |
| **98** | PC(14:0/18:1)+AcO | 790.56 | 281.249 | -80 | -50 | **387** | PG(18:2/18:2) | 769.503 | 279.233 | -80 | -50 |
| **99** | PC(14:0/18:2)+AcO | 788.545 | 279.233 | -80 | -50 | **388** | PG(18:2/18:3) | 767.487 | 277.217 | -80 | -50 |
| **100** | PC(14:0/18:3)+AcO | 786.529 | 277.217 | -80 | -50 | **389** | PG(18:2/20:1) | 799.549 | 309.28 | -80 | -50 |
| **101** | PC(14:0/20:1)+AcO | 818.592 | 309.28 | -80 | -50 | **390** | PG(18:2/20:2) | 797.534 | 307.264 | -80 | -50 |
| **102** | PC(14:0/20:2)+AcO | 816.576 | 307.264 | -80 | -50 | **391** | PG(18:2/20:3) | 795.518 | 305.249 | -80 | -50 |
| **103** | PC(14:0/20:3)+AcO | 814.56 | 305.249 | -80 | -50 | **392** | PG(18:2/20:4) | 793.503 | 303.233 | -80 | -50 |
| **104** | PC(14:0/20:4)+AcO | 812.545 | 303.233 | -80 | -50 | **393** | PG(18:2/20:5) | 791.487 | 301.217 | -80 | -50 |
| **105** | PC(14:0/20:5)+AcO | 810.529 | 301.217 | -80 | -50 | **394** | PG(18:2/22:4) | 821.534 | 331.264 | -80 | -50 |
| **106** | PC(14:0/22:4)+AcO | 840.576 | 331.264 | -80 | -50 | **395** | PG(18:2/22:5) | 819.518 | 329.249 | -80 | -50 |
| **107** | PC(14:0/22:5)+AcO | 838.56 | 329.249 | -80 | -50 | **396** | PG(18:2/22:6) | 817.503 | 327.233 | -80 | -50 |
| **108** | PC(14:0/22:6)+AcO | 836.545 | 327.233 | -80 | -50 | **397** | PG(20:0/16:1) | 775.549 | 253.217 | -80 | -50 |
| **109** | PC(16:0/14:0)+AcO | 764.545 | 227.202 | -80 | -50 | **398** | PG(20:0/18:1) | 803.581 | 281.249 | -80 | -50 |
| **110** | PC(16:0/16:0)+AcO | 792.576 | 255.233 | -80 | -50 | **399** | PG(20:0/18:2) | 801.565 | 279.233 | -80 | -50 |
| **111** | PC(16:0/16:1)+AcO | 790.56 | 253.217 | -80 | -50 | **400** | PG(20:0/18:3) | 799.549 | 277.217 | -80 | -50 |
| **112** | PC(16:0/18:0)+AcO | 820.607 | 283.264 | -80 | -50 | **401** | PG(20:0/20:1) | 831.612 | 309.28 | -80 | -50 |
| **113** | PC(16:0/18:1)+AcO | 818.592 | 281.249 | -80 | -50 | **402** | PG(20:0/20:2) | 829.596 | 307.264 | -80 | -50 |
| **114** | PC(16:0/18:2)+AcO | 816.576 | 279.233 | -80 | -50 | **403** | PG(20:0/20:3) | 827.581 | 305.249 | -80 | -50 |
| **115** | PC(16:0/18:3)+AcO | 814.56 | 277.217 | -80 | -50 | **404** | PG(20:0/20:4) | 825.565 | 303.233 | -80 | -50 |
| **116** | PC(16:0/20:1)+AcO | 846.623 | 309.28 | -80 | -50 | **405** | PG(20:0/20:5) | 823.549 | 301.217 | -80 | -50 |
| **117** | PC(16:0/20:2)+AcO | 844.607 | 307.264 | -80 | -50 | **406** | PG(20:0/22:4) | 853.596 | 331.264 | -80 | -50 |
| **118** | PC(16:0/20:3)+AcO | 842.592 | 305.249 | -80 | -50 | **407** | PG(20:0/22:5) | 851.581 | 329.249 | -80 | -50 |
| **119** | PC(16:0/20:4)+AcO | 840.576 | 303.233 | -80 | -50 | **408** | PG(20:0/22:6) | 849.565 | 327.233 | -80 | -50 |
| **120** | PC(16:0/20:5)+AcO | 838.56 | 301.217 | -80 | -50 | **409** | LPI(14:0) | 543.258 | 227.202 | -80 | -50 |
| **121** | PC(16:0/22:4)+AcO | 868.607 | 331.264 | -80 | -50 | **410** | LPI(16:0) | 571.289 | 255.233 | -80 | -50 |
| **122** | PC(16:0/22:5)+AcO | 866.592 | 329.249 | -80 | -50 | **411** | LPI(16:1) | 569.273 | 253.217 | -80 | -50 |
| **123** | PC(16:1/18:1)+AcO | 816.576 | 281.249 | -80 | -50 | **412** | LPI(18:0) | 599.32 | 283.264 | -80 | -50 |
| **124** | PC(16:1/18:2)+AcO | 814.56 | 253.217 | -80 | -50 | **413** | LPI(18:1) | 597.305 | 281.249 | -80 | -50 |
| **125** | PC(16:0/22:6)+AcO | 864.576 | 327.233 | -80 | -50 | **414** | LPI(18:2) | 595.289 | 279.233 | -80 | -50 |
| **126** | PC(18:0/14:0)+AcO | 792.576 | 227.202 | -80 | -50 | **415** | LPI(18:3) | 593.273 | 277.217 | -80 | -50 |
| **127** | PC(18:0/16:1)+AcO | 818.592 | 253.217 | -80 | -50 | **416** | LPI(20:0) | 627.352 | 311.3 | -80 | -50 |
| **128** | PC(18:0/18:0)+AcO | 848.639 | 283.264 | -80 | -50 | **417** | LPI(20:1) | 625.336 | 309.28 | -80 | -50 |
| **129** | PC(18:0/18:1)+AcO | 846.623 | 281.249 | -80 | -50 | **418** | LPI(20:2) | 623.32 | 307.264 | -80 | -50 |
| **130** | PC(18:0/18:2)+AcO | 844.607 | 279.233 | -80 | -50 | **419** | LPI(20:3) | 621.305 | 305.249 | -80 | -50 |
| **131** | PC(18:0/18:3)+AcO | 842.592 | 277.217 | -80 | -50 | **420** | LPI(20:4) | 619.289 | 303.233 | -80 | -50 |
| **132** | PC(18:0/20:0)+AcO | 876.67 | 283.264 | -80 | -50 | **421** | LPI(20:5) | 617.273 | 301.217 | -80 | -50 |
| **133** | PC(18:0/20:1)+AcO | 874.654 | 309.28 | -80 | -50 | **422** | LPI(22:4) | 647.32 | 331.264 | -80 | -50 |
| **134** | PC(18:0/20:2)+AcO | 872.639 | 307.264 | -80 | -50 | **423** | LPI(22:5) | 645.305 | 329.249 | -80 | -50 |
| **135** | PC(18:0/20:3)+AcO | 870.623 | 305.249 | -80 | -50 | **424** | LPI(22:6) | 643.289 | 327.233 | -80 | -50 |
| **136** | PC(18:0/20:4)+AcO | 868.607 | 303.233 | -80 | -50 | **425** | PI(14:0/14:0) | 753.456 | 227.202 | -80 | -50 |
| **137** | PC(18:0/20:5)+AcO | 866.592 | 301.217 | -80 | -50 | **426** | PI(14:0/18:1) | 807.503 | 281.249 | -80 | -50 |
| **138** | PC(18:0/22:4)+AcO | 896.639 | 331.264 | -80 | -50 | **427** | PI(14:0/18:2) | 805.487 | 279.233 | -80 | -50 |
| **139** | PC(18:0/22:5)+AcO | 894.623 | 329.249 | -80 | -50 | **428** | PI(14:0/18:3) | 803.472 | 277.217 | -80 | -50 |
| **140** | PC(18:0/22:6)+AcO | 892.607 | 327.233 | -80 | -50 | **429** | PI(14:0/20:1) | 835.534 | 309.28 | -80 | -50 |
| **141** | PC(18:1/16:1)+AcO | 816.576 | 281.249 | -80 | -50 | **430** | PI(14:0/20:2) | 833.518 | 307.264 | -80 | -50 |
| **142** | PC(18:1/18:1)+AcO | 844.607 | 281.249 | -80 | -50 | **431** | PI(14:0/20:3) | 831.503 | 305.249 | -80 | -50 |
| **143** | PC(18:1/18:2)+AcO | 842.592 | 279.233 | -80 | -50 | **432** | PI(14:0/20:4) | 829.487 | 303.233 | -80 | -50 |
| **144** | PC(18:1/18:3)+AcO | 840.576 | 277.217 | -80 | -50 | **433** | PI(14:0/20:5) | 827.472 | 301.217 | -80 | -50 |
| **145** | PC(18:1/20:1)+AcO | 872.639 | 309.28 | -80 | -50 | **434** | PI(14:0/22:4) | 857.518 | 331.264 | -80 | -50 |
| **146** | PC(18:1/20:2)+AcO | 870.623 | 307.264 | -80 | -50 | **435** | PI(14:0/22:5) | 855.503 | 329.249 | -80 | -50 |
| **147** | PC(18:1/20:3)+AcO | 868.607 | 305.249 | -80 | -50 | **436** | PI(14:0/22:6) | 853.487 | 327.233 | -80 | -50 |
| **148** | PC(18:1/20:4)+AcO | 866.592 | 303.233 | -80 | -50 | **437** | PI(16:0/14:0) | 781.487 | 227.202 | -80 | -50 |
| **149** | PC(18:1/20:5)+AcO | 864.576 | 301.217 | -80 | -50 | **438** | PI(16:0/16:0) | 809.518 | 255.233 | -80 | -50 |
| **150** | PC(18:1/22:4)+AcO | 894.623 | 331.264 | -80 | -50 | **439** | PI(16:0/16:1) | 807.503 | 253.217 | -80 | -50 |
| **151** | PC(18:1/22:5)+AcO | 892.607 | 329.249 | -80 | -50 | **440** | PI(16:0/18:0) | 837.55 | 283.264 | -80 | -50 |
| **152** | PC(18:1/22:6)+AcO | 890.592 | 327.233 | -80 | -50 | **441** | PI(16:0/18:1) | 835.534 | 281.249 | -80 | -50 |
| **153** | PC(18:2/16:1)+AcO | 814.56 | 279.233 | -80 | -50 | **442** | PI(16:0/18:2) | 833.518 | 279.233 | -80 | -50 |
| **154** | PC(18:2/18:2)+AcO | 840.576 | 279.233 | -80 | -50 | **443** | PI(16:0/18:3) | 814.561 | 277.218 | -80 | -50 |
| **155** | PC(18:2/18:3)+AcO | 838.56 | 277.217 | -80 | -50 | **444** | PI(16:0/20:1) | 863.565 | 309.28 | -80 | -50 |
| **156** | PC(18:2/20:1)+AcO | 870.623 | 309.28 | -80 | -50 | **445** | PI(16:0/20:2) | 861.55 | 307.264 | -80 | -50 |
| **157** | PC(18:2/20:2)+AcO | 868.607 | 307.264 | -80 | -50 | **446** | PI(16:0/20:3) | 859.534 | 305.249 | -80 | -50 |
| **158** | PC(18:2/20:3)+AcO | 866.592 | 305.249 | -80 | -50 | **447** | PI(16:0/20:4) | 857.518 | 303.233 | -80 | -50 |
| **159** | PC(18:2/20:4)+AcO | 864.576 | 303.233 | -80 | -50 | **448** | PI(16:0/20:5) | 855.503 | 301.217 | -80 | -50 |
| **160** | PC(18:2/20:5)+AcO | 862.56 | 301.217 | -80 | -50 | **449** | PI(16:0/22:4) | 885.55 | 331.264 | -80 | -50 |
| **161** | PC(18:2/22:4)+AcO | 892.607 | 331.264 | -80 | -50 | **450** | PI(16:0/22:5) | 883.534 | 329.249 | -80 | -50 |
| **162** | PC(18:2/22:5)+AcO | 890.592 | 329.249 | -80 | -50 | **451** | PI(16:0/22:6) | 881.518 | 327.233 | -80 | -50 |
| **163** | PC(18:2/22:6)+AcO | 888.576 | 327.233 | -80 | -50 | **452** | PI(18:0/14:0) | 809.518 | 227.202 | -80 | -50 |
| **164** | PC(20:0/16:1)+AcO | 846.623 | 253.217 | -80 | -50 | **453** | PI(18:0/16:1) | 835.534 | 253.217 | -80 | -50 |
| **165** | PC(20:0/18:1)+AcO | 874.654 | 281.249 | -80 | -50 | **454** | PI(18:0/18:0) | 865.581 | 283.264 | -80 | -50 |
| **166** | PC(20:0/18:3)+AcO | 870.623 | 277.217 | -80 | -50 | **455** | PI(18:0/18:1) | 863.565 | 281.249 | -80 | -50 |
| **167** | PC(20:0/20:1)+AcO | 902.685 | 309.28 | -80 | -50 | **456** | PI(18:0/18:2) | 861.55 | 279.233 | -80 | -50 |
| **168** | PC(20:0/20:2)+AcO | 900.67 | 307.264 | -80 | -50 | **457** | PI(18:0/18:3) | 859.534 | 277.217 | -80 | -50 |
| **169** | PC(20:0/20:3)+AcO | 898.654 | 305.249 | -80 | -50 | **458** | PI(18:0/20:0) | 893.612 | 283.264 | -80 | -50 |
| **170** | PC(20:0/20:4)+AcO | 896.639 | 303.233 | -80 | -50 | **459** | PI(18:0/20:1) | 891.597 | 309.28 | -80 | -50 |
| **171** | PC(20:0/20:5)+AcO | 894.623 | 301.217 | -80 | -50 | **460** | PI(18:0/20:2) | 889.581 | 307.264 | -80 | -50 |
| **172** | PC(20:0/22:4)+AcO | 924.67 | 331.264 | -80 | -50 | **461** | PI(18:0/20:3) | 887.565 | 305.249 | -80 | -50 |
| **173** | PC(20:0/22:5)+AcO | 922.654 | 329.249 | -80 | -50 | **462** | PI(18:0/20:4) | 885.55 | 303.233 | -80 | -50 |
| **174** | PC(20:0/22:6)+AcO | 920.639 | 327.233 | -80 | -50 | **463** | PI(18:0/20:5) | 883.534 | 301.217 | -80 | -50 |
| **175** | LPE(14:0) | 424.247 | 227.202 | -80 | -50 | **464** | PI(18:0/22:4) | 913.581 | 331.264 | -80 | -50 |
| **176** | LPE(16:0) | 452.278 | 255.233 | -80 | -40 | **465** | PI(18:0/22:5) | 911.565 | 329.249 | -80 | -50 |
| **177** | LPE(16:1) | 450.263 | 253.217 | -80 | -40 | **466** | PI(18:0/22:6) | 909.55 | 327.233 | -80 | -50 |
| **178** | LPE(18:0) | 480.31 | 283.264 | -80 | -40 | **467** | PI(18:1/16:1) | 833.518 | 281.249 | -80 | -50 |
| **179** | LPE(18:1) | 478.293 | 281.249 | -80 | -40 | **468** | PI(18:1/18:1) | 861.55 | 281.249 | -80 | -50 |
| **180** | LPE(18:2) | 476.278 | 279.233 | -80 | -40 | **469** | PI(18:1/18:2) | 859.534 | 279.233 | -80 | -50 |
| **181** | LPE(18:3) | 474.263 | 277.217 | -80 | -40 | **470** | PI(18:1/18:3) | 857.518 | 277.217 | -80 | -50 |
| **182** | LPE(20:0) | 508.341 | 311.3 | -80 | -40 | **471** | PI(18:1/20:1) | 889.581 | 309.28 | -80 | -50 |
| **183** | LPE(20:1) | 506.325 | 309.28 | -80 | -40 | **472** | PI(18:1/20:2) | 887.565 | 307.264 | -80 | -50 |
| **184** | LPE(20:2) | 504.31 | 307.264 | -80 | -40 | **473** | PI(18:1/20:3) | 885.55 | 305.249 | -80 | -50 |
| **185** | LPE(20:3) | 502.294 | 305.249 | -80 | -40 | **474** | PI(18:1/20:4) | 883.534 | 303.233 | -80 | -50 |
| **186** | LPE(20:4) | 500.278 | 303.233 | -80 | -40 | **475** | PI(18:1/20:5) | 881.518 | 301.217 | -80 | -50 |
| **187** | LPE(20:5) | 498.263 | 301.217 | -80 | -40 | **476** | PI(18:1/22:4) | 911.565 | 331.264 | -80 | -50 |
| **188** | LPE(22:4) | 528.31 | 331.264 | -80 | -40 | **477** | PI(18:1/22:5) | 909.55 | 329.249 | -80 | -50 |
| **189** | LPE(22:5) | 526.294 | 329.249 | -80 | -40 | **478** | PI(18:1/22:6) | 907.534 | 327.233 | -80 | -50 |
| **190** | LPE(22:6) | 524.278 | 327.233 | -80 | -40 | **479** | PI(18:2/16:1) | 831.503 | 279.233 | -80 | -50 |
| **191** | PE(14:0/14:0) | 634.445 | 227.202 | -80 | -43 | **480** | PI(18:2/18:2) | 857.518 | 279.233 | -80 | -50 |
| **192** | PE(14:0/16:1) | 660.461 | 253.217 | -80 | -43 | **481** | PI(18:2/18:3) | 855.503 | 277.217 | -80 | -50 |
| **193** | PE(14:0/18:1) | 688.492 | 281.249 | -80 | -43 | **482** | PI(18:2/20:1) | 887.565 | 309.28 | -80 | -50 |
| **194** | PE(14:0/18:2) | 686.477 | 279.233 | -80 | -50 | **483** | PI(18:2/20:2) | 885.55 | 307.264 | -80 | -50 |
| **195** | PE(14:0/18:3) | 684.461 | 277.217 | -80 | -50 | **484** | PI(18:2/20:3) | 883.534 | 305.249 | -80 | -50 |
| **196** | PE(14:0/20:1) | 716.524 | 309.28 | -80 | -50 | **485** | PI(18:2/20:4) | 881.518 | 303.233 | -80 | -50 |
| **197** | PE(14:0/20:2) | 714.508 | 307.264 | -80 | -50 | **486** | PI(18:2/20:5) | 879.503 | 301.217 | -80 | -50 |
| **198** | PE(14:0/20:3) | 712.492 | 305.249 | -80 | -50 | **487** | PI(18:2/22:4) | 909.55 | 331.264 | -80 | -50 |
| **199** | PE(14:0/20:4) | 710.477 | 303.233 | -80 | -50 | **488** | PI(18:2/22:5) | 907.534 | 329.249 | -80 | -50 |
| **200** | PE(14:0/20:5) | 708.461 | 301.217 | -80 | -50 | **489** | PI(18:2/22:6) | 905.518 | 327.233 | -80 | -50 |
| **201** | PE(14:0/22:4) | 738.508 | 331.264 | -80 | -50 | **490** | PI(20:0/16:1) | 863.565 | 253.217 | -80 | -50 |
| **202** | PE(14:0/22:5) | 736.492 | 329.249 | -80 | -50 | **491** | PI(20:0/18:1) | 891.597 | 281.249 | -80 | -50 |
| **203** | PE(14:0/22:6) | 734.477 | 327.233 | -80 | -50 | **492** | PI(20:0/18:2) | 889.581 | 279.233 | -80 | -50 |
| **204** | PE(16:0/14:0) | 662.477 | 255.233 | -80 | -50 | **493** | PI(20:0/18:3) | 887.565 | 277.217 | -80 | -50 |
| **205** | PE(16:0/16:0) | 690.508 | 255.233 | -80 | -50 | **494** | PI(20:0/20:1) | 919.628 | 309.28 | -80 | -50 |
| **206** | PE(16:0/16:1) | 688.492 | 253.217 | -80 | -50 | **495** | PI(20:0/20:2) | 917.612 | 307.264 | -80 | -50 |
| **207** | PE(16:0/18:1) | 716.524 | 281.249 | -80 | -50 | **496** | PI(20:0/20:3) | 915.597 | 305.249 | -80 | -50 |
| **208** | PE(16:0/18:2) | 714.508 | 279.233 | -80 | -50 | **497** | PI(20:0/20:4) | 913.581 | 303.233 | -80 | -50 |
| **209** | PE(16:0/18:3) | 712.492 | 277.217 | -80 | -50 | **498** | PI(20:0/20:5) | 911.565 | 301.217 | -80 | -50 |
| **210** | PE(16:0/20:1) | 744.555 | 309.28 | -80 | -50 | **499** | PI(20:0/22:5) | 939.597 | 329.249 | -80 | -50 |
| **211** | PE(16:0/20:2) | 742.539 | 307.264 | -80 | -50 | **500** | PI(20:0/22:6) | 937.581 | 327.233 | -80 | -50 |
| **212** | PE(16:0/20:3) | 740.524 | 305.249 | -80 | -50 | **501** | PS(14:0/14:0) | 678.435 | 227.202 | -80 | -50 |
| **213** | PE(16:0/20:4) | 738.508 | 303.233 | -80 | -50 | **502** | PS(14:0/18:1) | 732.482 | 281.249 | -80 | -50 |
| **214** | PE(16:0/20:5) | 736.492 | 301.217 | -80 | -50 | **503** | PS(14:0/18:2) | 730.466 | 279.233 | -80 | -50 |
| **215** | PE(16:0/22:4) | 766.539 | 331.264 | -80 | -50 | **504** | PS(14:0/18:3) | 728.451 | 277.217 | -80 | -50 |
| **216** | PE(16:0/22:5) | 764.524 | 329.249 | -80 | -50 | **505** | PS(14:0/20:1) | 760.513 | 309.28 | -80 | -50 |
| **217** | PE(16:0/22:6) | 762.508 | 327.233 | -80 | -50 | **506** | PS(14:0/20:2) | 758.498 | 307.264 | -80 | -50 |
| **218** | PE(18:0/14:0) | 690.508 | 283.264 | -80 | -50 | **507** | PS(14:0/20:3) | 756.482 | 305.249 | -80 | -50 |
| **219** | PE(18:0/16:0) | 718.539 | 283.264 | -80 | -50 | **508** | PS(14:0/20:4) | 754.466 | 303.233 | -80 | -50 |
| **220** | PE(18:0/16:1) | 716.524 | 283.264 | -80 | -50 | **509** | PS(14:0/20:5) | 752.451 | 301.217 | -80 | -50 |
| **221** | PE(18:0/18:0) | 746.57 | 283.264 | -80 | -50 | **510** | PS(14:0/22:4) | 782.498 | 331.264 | -80 | -50 |
| **222** | PE(18:0/18:1) | 744.555 | 281.249 | -80 | -50 | **511** | PS(14:0/22:5) | 780.482 | 329.249 | -80 | -50 |
| **223** | PE(18:0/18:2) | 742.539 | 279.233 | -80 | -50 | **512** | PS(14:0/22:6) | 778.466 | 327.233 | -80 | -50 |
| **224** | PE(18:0/18:3) | 740.524 | 277.217 | -80 | -50 | **513** | PS(16:0/14:0) | 706.466 | 227.202 | -80 | -50 |
| **225** | PE(18:0/20:1) | 772.586 | 309.28 | -80 | -50 | **514** | PS(16:0/16:0) | 734.498 | 255.233 | -80 | -50 |
| **226** | PE(18:0/20:2) | 770.57 | 307.264 | -80 | -50 | **515** | PS(16:0/16:1) | 732.482 | 253.217 | -80 | -50 |
| **227** | PE(18:0/20:3) | 768.555 | 305.249 | -80 | -50 | **516** | PS(16:0/18:0) | 760.513 | 283.264 | -80 | -50 |
| **228** | PE(18:0/20:4) | 766.539 | 303.233 | -80 | -50 | **517** | PS(16:0/18:1) | 760.513 | 281.249 | -80 | -50 |
| **229** | PE(18:0/20:5) | 764.524 | 301.217 | -80 | -50 | **518** | PS(16:0/18:2) | 758.498 | 279.233 | -80 | -50 |
| **230** | PE(18:0/22:4) | 794.57 | 331.264 | -80 | -50 | **519** | PS(16:0/18:3) | 756.482 | 277.217 | -80 | -50 |
| **231** | PE(18:0/22:5) | 792.555 | 329.249 | -80 | -50 | **520** | PS(16:0/20:1) | 788.545 | 309.28 | -80 | -50 |
| **232** | PE(18:0/22:6) | 790.539 | 327.233 | -80 | -50 | **521** | PS(16:0/20:2) | 786.529 | 307.264 | -80 | -50 |
| **233** | PE(18:1/16:1) | 714.508 | 281.249 | -80 | -50 | **522** | PS(16:0/20:3) | 784.513 | 305.249 | -80 | -50 |
| **234** | PE(18:1/18:1) | 742.539 | 281.249 | -80 | -50 | **523** | PS(16:0/20:4) | 782.498 | 303.233 | -80 | -50 |
| **235** | PE(18:1/18:2) | 740.524 | 279.233 | -80 | -50 | **524** | PS(16:0/20:5) | 780.482 | 301.217 | -80 | -50 |
| **236** | PE(18:1/18:3) | 738.508 | 277.217 | -80 | -50 | **525** | PS(16:0/22:4) | 810.529 | 331.264 | -80 | -50 |
| **237** | PE(18:1/20:1) | 770.57 | 309.28 | -80 | -50 | **526** | PS(16:0/22:5) | 808.513 | 329.249 | -80 | -50 |
| **238** | PE(18:1/20:2) | 768.555 | 307.264 | -80 | -50 | **527** | PS(16:0/22:6) | 806.498 | 327.233 | -80 | -50 |
| **239** | PE(18:1/20:3) | 766.539 | 305.249 | -80 | -50 | **528** | PS(18:0/14:0) | 734.498 | 227.202 | -80 | -50 |
| **240** | PE(18:1/20:4) | 764.524 | 303.233 | -80 | -50 | **529** | PS(18:0/16:1) | 760.513 | 253.217 | -80 | -50 |
| **241** | PE(18:1/20:5) | 762.508 | 301.217 | -80 | -50 | **530** | PS(18:0/18:0) | 790.56 | 283.264 | -80 | -50 |
| **242** | PE(18:1/22:4) | 792.555 | 331.264 | -80 | -50 | **531** | PS(18:0/18:1) | 788.545 | 281.249 | -80 | -50 |
| **243** | PE(18:1/22:5) | 790.539 | 329.249 | -80 | -50 | **532** | PS(18:0/18:2) | 786.529 | 279.233 | -80 | -50 |
| **244** | PE(18:1/22:6) | 788.524 | 327.233 | -80 | -50 | **533** | PS(18:0/18:3) | 784.513 | 277.217 | -80 | -50 |
| **245** | PE(18:2/16:1) | 712.492 | 279.233 | -80 | -50 | **534** | PS(18:0/20:0) | 818.592 | 283.264 | -80 | -50 |
| **246** | PE(18:2/18:2) | 738.508 | 279.233 | -80 | -50 | **535** | PS(18:0/20:1) | 816.576 | 309.28 | -80 | -50 |
| **247** | PE(18:2/18:3) | 736.492 | 277.217 | -80 | -50 | **536** | PS(18:0/20:2) | 814.56 | 307.264 | -80 | -50 |
| **248** | PE(18:2/20:1) | 768.555 | 309.28 | -80 | -50 | **537** | PS(18:0/20:3) | 812.545 | 305.249 | -80 | -50 |
| **249** | PE(18:2/20:2) | 766.539 | 307.264 | -80 | -50 | **538** | PS(18:0/20:4) | 810.529 | 303.233 | -80 | -50 |
| **250** | PE(18:2/20:3) | 764.524 | 305.249 | -80 | -50 | **539** | PS(18:0/20:5) | 808.513 | 301.217 | -80 | -50 |
| **251** | PE(18:2/20:4) | 762.508 | 303.233 | -80 | -50 | **540** | PS(18:0/22:4) | 838.56 | 331.264 | -80 | -50 |
| **252** | PE(18:2/20:5) | 760.492 | 301.217 | -80 | -50 | **541** | PS(18:0/22:5) | 836.545 | 329.249 | -80 | -50 |
| **253** | PE(18:2/22:4) | 790.539 | 331.264 | -80 | -50 | **542** | PS(18:0/22:6) | 834.529 | 327.233 | -80 | -50 |
| **254** | PE(18:2/22:5) | 788.524 | 329.249 | -80 | -50 | **543** | PS(18:1/16:1) | 758.498 | 281.249 | -80 | -50 |
| **255** | PE(18:2/22:6) | 786.508 | 327.233 | -80 | -50 | **544** | PS(18:1/18:1) | 786.529 | 281.249 | -80 | -50 |
| **256** | PE(O-16:0/16:0) | 676.529 | 255.233 | -80 | -50 | **545** | PS(18:1/18:2) | 784.513 | 279.233 | -80 | -50 |
| **257** | PE(O-16:0/16:1) | 674.513 | 253.217 | -80 | -50 | **546** | PS(18:1/18:3) | 782.498 | 277.217 | -80 | -50 |
| **258** | PE(O-16:0/18:0) | 704.56 | 283.264 | -80 | -50 | **547** | PS(18:1/20:1) | 814.56 | 309.28 | -80 | -50 |
| **259** | PE(O-16:0/18:1) | 702.544 | 281.249 | -80 | -50 | **548** | PS(18:1/20:2) | 812.545 | 307.264 | -80 | -50 |
| **260** | PE(O-16:0/18:2) | 700.529 | 279.233 | -80 | -50 | **549** | PS(18:1/20:3) | 810.529 | 305.249 | -80 | -50 |
| **261** | PE(O-16:0/18:3) | 698.513 | 277.217 | -80 | -50 | **550** | PS(18:1/20:4) | 808.513 | 303.233 | -80 | -50 |
| **262** | PE(O-16:0/20:1) | 730.576 | 309.28 | -80 | -50 | **551** | PS(18:1/20:5) | 806.498 | 301.217 | -80 | -50 |
| **263** | PE(O-16:0/20:2) | 728.56 | 307.264 | -80 | -50 | **552** | PS(18:1/22:4) | 836.545 | 331.264 | -80 | -50 |
| **264** | PE(O-16:0/20:3) | 726.544 | 305.249 | -80 | -50 | **553** | PS(18:1/22:5) | 834.529 | 329.249 | -80 | -50 |
| **265** | PE(O-16:0/20:4) | 724.529 | 303.233 | -80 | -50 | **554** | PS(18:1/22:6) | 832.513 | 327.233 | -80 | -50 |
| **266** | PE(O-16:0/20:5) | 722.513 | 301.217 | -80 | -50 | **555** | PS(18:2/16:1) | 756.482 | 279.233 | -80 | -50 |
| **267** | PE(O-16:0/22:4) | 752.56 | 331.264 | -80 | -50 | **556** | PS(18:2/18:2) | 782.498 | 279.233 | -80 | -50 |
| **268** | PE(O-16:0/22:5) | 750.544 | 329.249 | -80 | -50 | **557** | PS(18:2/18:3) | 780.482 | 277.217 | -80 | -50 |
| **269** | PE(O-16:0/22:6) | 748.529 | 327.233 | -80 | -50 | **558** | PS(18:2/20:1) | 812.545 | 309.28 | -80 | -50 |
| **270** | PE(O-18:0/16:0) | 704.56 | 255.233 | -80 | -50 | **559** | PS(18:2/20:2) | 810.529 | 307.264 | -80 | -50 |
| **271** | PE(O-18:0/16:1) | 702.544 | 253.217 | -80 | -50 | **560** | PS(18:2/20:3) | 808.513 | 305.249 | -80 | -50 |
| **272** | PE(O-18:0/18:0) | 732.591 | 283.264 | -80 | -50 | **561** | PS(18:2/20:4) | 806.498 | 303.233 | -80 | -50 |
| **273** | PE(O-18:0/18:1) | 730.576 | 281.249 | -80 | -50 | **562** | PS(18:2/20:5) | 804.482 | 301.217 | -80 | -50 |
| **274** | PE(O-18:0/18:2) | 728.56 | 279.233 | -80 | -50 | **563** | PS(18:2/22:4) | 834.529 | 331.264 | -80 | -50 |
| **275** | PE(O-18:0/18:3) | 726.544 | 277.217 | -80 | -50 | **564** | PS(18:2/22:5) | 832.513 | 329.249 | -80 | -50 |
| **276** | PE(O-18:0/20:1) | 758.607 | 309.28 | -80 | -50 | **565** | PS(18:2/22:6) | 830.498 | 327.233 | -80 | -50 |
| **277** | PE(O-18:0/20:2) | 756.591 | 307.264 | -80 | -50 | **566** | PS(20:0/16:1) | 788.545 | 253.217 | -80 | -50 |
| **278** | PE(O-18:0/20:3) | 754.576 | 305.249 | -80 | -50 | **567** | PS(20:0/18:1) | 814.56 | 281.249 | -80 | -50 |
| **279** | PE(O-18:0/20:4) | 752.56 | 303.233 | -80 | -50 | **568** | PS(20:0/18:2) | 814.561 | 279.234 | -80 | -50 |
| **280** | PE(O-18:0/20:5) | 750.544 | 301.217 | -80 | -50 | **569** | PS(20:0/18:3) | 812.545 | 277.217 | -80 | -50 |
| **281** | PE(O-18:0/22:4) | 780.591 | 331.264 | -80 | -50 | **570** | PS(20:0/20:1) | 844.607 | 309.28 | -80 | -50 |
| **282** | PE(O-18:0/22:5) | 778.576 | 329.249 | -80 | -50 | **571** | PS(20:0/20:2) | 842.592 | 307.264 | -80 | -50 |
| **283** | PE(O-18:0/22:6) | 776.56 | 327.233 | -80 | -50 | **572** | PS(20:0/20:3) | 840.576 | 305.249 | -80 | -50 |
| **284** | PE(P-14:0/18:0) | 674.5 | 283.264 | -80 | -50 | **573** | PS(20:0/20:4) | 838.56 | 303.233 | -80 | -50 |
| **285** | PE(P-14:0/18:1) | 672.5 | 281.249 | -80 | -50 | **574** | PS(20:0/20:5) | 836.545 | 301.217 | -80 | -50 |
| **286** | PE(P-16:0/16:0) | 674.5 | 255.233 | -80 | -50 | **575** | PS(20:0/22:4) | 866.592 | 331.264 | -80 | -50 |
| **287** | PE(P-16:0/16:1) | 672.5 | 253.217 | -80 | -50 | **576** | PS(20:0/22:5) | 864.576 | 329.249 | -80 | -50 |
| **288** | PE(P-16:0/18:0) | 702.5 | 283.264 | -80 | -50 | **577** | PS(20:0/22:6) | 862.56 | 327.233 | -80 | -50 |
| **289** | PE(P-16:0/18:1) | 700.5 | 281.249 | -80 | -50 |  |  |  |  |  |  |

Table S3 Univariate and multivariate ROC analysis of 11 differential lipids

|  | univariate analyse | | | multivariate analysis | |
| --- | --- | --- | --- | --- | --- |
|  | AUC | OR (95% CI) | P value | AUC | OR (95% CI) |
| CE (20:0) | 0.731 | 0.566-0.848 | 1.49E-4 | 0.929 | 0.842-1 |
| CE(20:5) | 0.814 | 0.704-0.912 | 6.52E-4 |
| LPI(18:3) | 0.933 | 0.854-0.988 | 2.10E-8 | 0.95 | 0.819-1 |
| LPI(18:2) | 0.883 | 0.797-0.963 | 0.005 |
| PA(20:0/20:5) | 0.833 | 0.719-0.919 | 2.23E-5 | -- | -- |
| PE(P-18:0/18:3) | 0.886 | 0.796-0.954 | 9.04E-5 | 0.903 | 0.702-0.988 |
| PE(P-18:1/20:5) | 0.832 | 0.713-0.832 | 4.14E-5 |
| PE(P-16:0/20:5) | 0.842 | 0.729-0.922 | 4.48E-5 |
| PE(P-18:0/20:5) | 0.817 | 0.682-0.907 | 4.42E-5 |
| PE(O-18:0/20:3) | 0.80 | 0.684-0.899 | 2.68E-4 |
| PE(O-18:0/20:4) | 0.893 | 0.795-0.954 | 6.05E-7 |
